# Supplementary material for: Metal-coupled folding as the driving force for the extreme stability of Rad50 zinc hook dimer assembly
Source: PubMed Central journal article supplement (PMC5093744; doi:10.1038/srep36346), 2016-11-03
Supplement: srep36346-s1.pdf [file srep36346-s1.pdf]

*Supplementary information*

**Metal-coupled folding as the driving force for the  
extreme stability of Rad50 zinc hook dimer assembly**

Tomasz Kochańczyk<sup>1</sup>, Michał Nowakowski<sup>2</sup>, Dominika Wojewska<sup>1</sup>, Anna Kocyla<sup>1</sup>, Andrzej  
Ejchart<sup>3</sup>, Wiktor Koźmiński<sup>2</sup> and Artur Krężel<sup>1\*</sup>

Contribution from

<sup>1</sup>*Department of Chemical Biology, Faculty of Biotechnology, University of Wrocław, Joliot-Curie 14a,  
50-383 Wrocław, Poland,*

<sup>2</sup>*Faculty of Chemistry, Biological and Chemical Research Centre, University of Warsaw, Żwirki  
i Wigury 101, 02-089 Warsaw, Poland,*

<sup>3</sup>*Institute of Biochemistry and Biophysics, Polish Academy of Science, Pawińskiego 5a, 02-106  
Warsaw, Poland*

Correspondence to Artur Krężel,

E-mail: artur.krezel@uwr.edu.pl

## Experimental section

### Peptide synthesis

Zinc hook peptides (Hk) were synthesized via solid-phase synthesis (SPPS) using an Fmoc-strategy on a TentaGel R RAM Amide Rink (Rapp Polymere GmbH, Tuebingen Germany) resin (substitution 0.2 mmol/g) and a Liberty 1 microwave-assisted synthesizer (CEM). All peptides were N-terminally acetylated. Amide-to-ester backbone bond-substituted peptide analogs (*depsiHk*) were synthesized according to the published procedure<sup>1</sup> followed by fragment condensation. The crude peptides were purified via high-performance liquid chromatography (HPLC) (Dionex Ultimate 3000) on Phenomenex PEPTIDE XB-C18 columns using 0.1% TFA in H<sub>2</sub>O with an acetonitrile (ACN) gradient. The purified peptides were identified by electrospray ionization (ESI) mass spectrometry with an API 2000 Applied Biosystems instrument. The identified and calculated mass values are listed in Table S9.

### Depsipeptide synthesis

Depsipeptides were synthesized via the fragment condensation of protected Ac-AKGKCPV-OH with resin-attached C\*GRELTD (Scheme S1).<sup>1</sup> Briefly, the protected RELTD peptide was synthesized on a TentaGel R RAM Amide Rink. After Fmoc group removal from the arginine residue, the resin containing the peptide was mixed with 8 eq. of glycolic acid, 7 eq. of (1-cyano-2-ethoxy-2-oxoethylideneaminoxy)-dimethylamino-morpholino-carbenium hexafluorophosphate (COMU) and 16 eq. of *N,N*-diisopropylethylamine (DIEA) in DMF and then incubated for 5 min at 75°C in a Discovery microwave-assisted (CEM) reactor and for 1 h at room temperature. Subsequently, 5.6 eq. of Fmoc-Cys(Trt)-OH was dissolved in cold dichloromethane/*N,N*-dimethylformamide (DCM/DMF; 50/50 v/v), mixed with 5 eq. of *N,N'*-diisopropylcarbodiimide (DIC) and kept on ice for 15 minutes. Finally, this mixture was added to the resin, followed by the addition of 0.1 eq. of 4-dimethylaminopyridine (DMAP) and 2 eq. of *N*-ethyl-morpholine (NEM); the mixture was then incubated for 1 h at room temperature with agitation. The coupling step was repeated once. Ac-AKGKCPV-OH was synthesized on a 2-chlorotrityl chloride resin (100-200 mesh, 1% divinylbenzene [DVB]), according to the standard SPPS Fmoc-strategy. The acetylated peptide with side-chain protection groups was cleaved from the resin (Scheme S1). The final coupling step was performed in DCM/DMF (50/50 v/v) with the protected Ac-AKGKCPV peptide provided in 1.5-molar excess over resin-attached C\*GRELTD peptide in the presence of 2 eq. of COMU

and 3 eq. of DIEA for 12 h. Other depsipeptides used in this study (*depsiHk8*, *depsiHk14LA*, and *depsiHk14VALA*) were synthesized using the same procedure. The N-terminal-acetylated resin-attached peptides were cleaved from the resin using a mixture of trifluoroacetic acid (TFA)/thioanisole/1,2-ethanedithiol (EDT)/anisole (90/5/3/2 v/v/v/v) for 2 h. The crude peptides were purified via high-performance liquid chromatography (HPLC) (Dionex Ultimate 3000) on Phenomenex PEPTIDE XB-C18 columns using 0.1% TFA in H<sub>2</sub>O with an acetonitrile (ACN) gradient. The purified peptides were identified by electrospray ionization (ESI) mass spectrometry with an API 2000 Applied Biosystems instrument. The identified and calculated mass values are listed in Table S10.

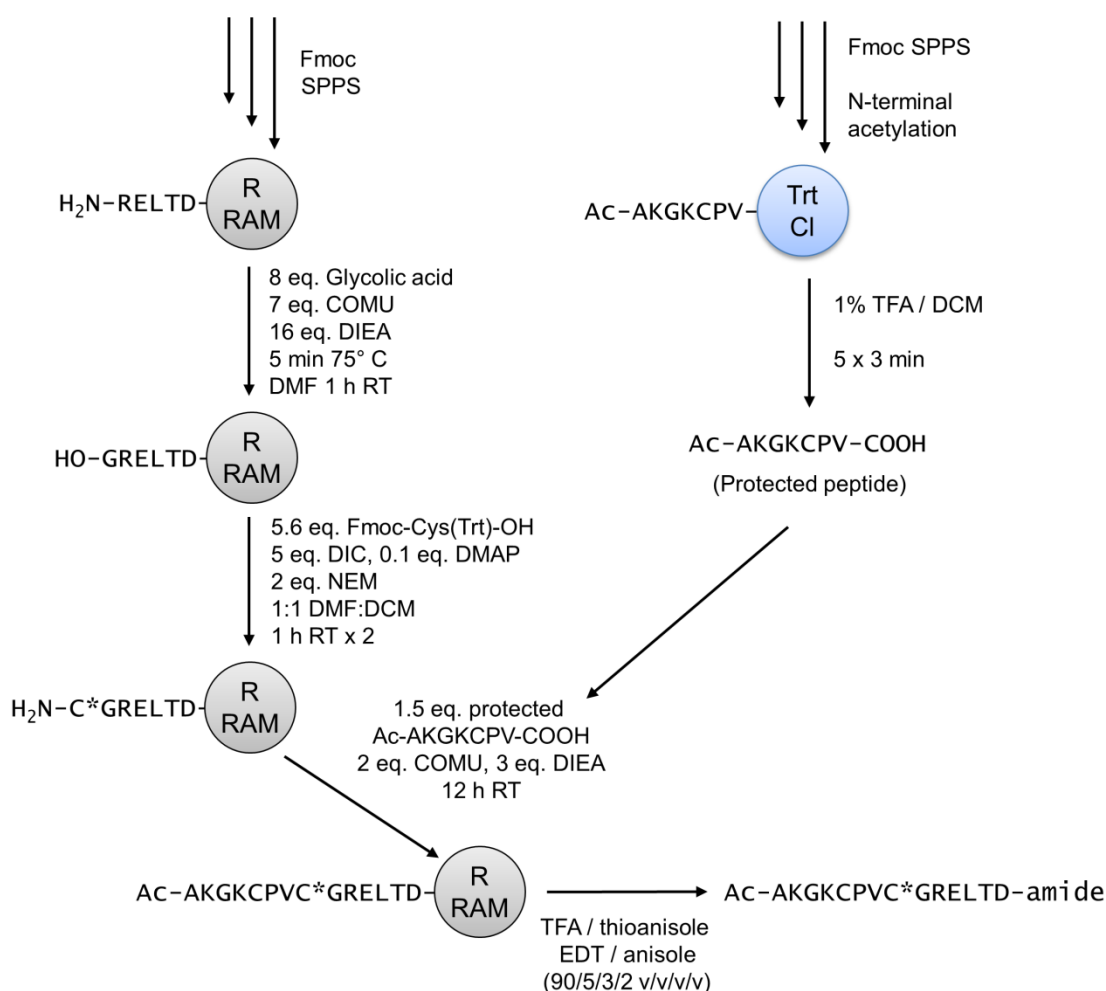

**Scheme S1.** Scheme of the synthesis of *depsiHk14* peptide. Asterisk (\*) denotes localization of the ester bond.<sup>1</sup>

### **Spectropolarimetric titrations with Zn<sup>2+</sup>**

Titration were performed at 25°C under nitrogen atmosphere by adding aliquots of degassed zinc sulfate stock solution to a quartz cuvette (1 cm path length) containing peptide solution. Measurements were performed in 10 mM Tris-HCl buffer, pH 7.4 ( $I = 0.1$  M from NaClO<sub>4</sub>), 100–200 μM TCEP and a final peptide concentration of 5–50 μM, depending on the peptide length. The concentrations of the peptide solutions were determined with Ellman's reagent using a molar absorption coefficient of 14 150 M<sup>-1</sup> cm<sup>-1</sup>.<sup>2</sup> Spectra were measured on a Jasco J-1500 spectropolarimeter with a Peltier heating/cooling system. Three accumulations from 197 to 260 nm were averaged using a 5 nm band width, a 200 nm/min scanning speed, and a 1.0 nm data pitch. TCEP forms a very weak Zn<sup>2+</sup> complex ( $\log K_{ML} = 2.91$ ) compared to the zinc hook peptides, and its metal-binding ability can be neglected.<sup>3</sup>

### **Potentiometric titrations**

The protonation constants of the Hk4-Hk14 zinc hook peptides, depsipeptides, and stability constants of their Zn<sup>2+</sup> complexes were determined at 25°C at 0.1 M ionic strength by potentiometric titration over a range of 2.5 to 10.8 (Molspin automatic titrator) under argon atmosphere using standardized 0.1 M NaOH as a titrant. The data were analyzed using SUPERQUAD software.<sup>4</sup>

### **Competitive titrations**

The apparent formation constants of Zn<sup>2+</sup> complexes with Hk23-45, Hk45VA, Hk45LA, and ZnHk45VALA were determined spectropolarimetrically (Jasco J-1500) at 25°C in the presence of HEDTA ( $\log K = 12.2$ ), EDTA ( $\log K = 13.6$ ) or TPEN ( $\log K = 15.2$ ).<sup>5</sup> In each experiment, 5 μM zinc hook peptide was incubated with 25 μM chelator and 0-25 μM ZnSO<sub>4</sub> in 10 mM Tris-HCl buffer ( $I = 0.1$  M from NaClO<sub>4</sub>) with 100 μM TCEP. Samples were incubated for 36 h under a nitrogen atmosphere. Formation of the Zn(Hk)<sub>2</sub> complex was monitored by measuring the ellipticity at 216 and 222 nm. The free Zn<sup>2+</sup> concentration present in each sample after equilibration was calculated from the total chelator and metal concentrations, corrected for the Zn<sup>2+</sup> transferred to the zinc hook peptide complex (Zn(Hk)<sub>2</sub>). Calculations were performed using the Hyperquad Simulation and Speciation Software (HySS2009).<sup>6</sup> To obtain the apparent formation constants, first, we determined the normalized isotherms corresponding to complex formation by fitting with Hill's equation (equation (1)), where  $\Theta$ ,  $\Theta_{\min}$  and  $\Theta_{\max}$  are the observed minimum and maximum ellipticities, respectively. Here,  $n$  is the cooperativity index (Hill's coefficient),  $x$  is the free Zn<sup>2+</sup> concentration at a

specific experimental point, and  $[Zn^{2+}_{0.5}]$  is the free  $Zn^{2+}$  concentration at the half-point saturation of the  $Zn(Hk)_2$  complex:

$$\Theta = \Theta_{\min} \left( \frac{x^n}{x^n + [Zn^{2+}_{0.5}]^n} \right) + \Theta_{\max} \left( \frac{[Zn^{2+}_{0.5}]^n}{x^n + [Zn^{2+}_{0.5}]^n} \right) \quad (1)$$

The obtained concentrations of free  $Zn^{2+}$ , referring to the half-point complex saturation  $[Zn^{2+}_{0.5}]$ , where half of the total peptide is in the form of  $Zn(Hk)_2$  complex and half is in the metal-free form Hk, were subsequently used to calculate the apparent formation constants ( $K_{12}$ ) based on equation (2), which was derived from equation (3):

$$K_{12} = \frac{1.25 \mu\text{M}}{[Zn^{2+}_{0.5}] \times (5 \mu\text{M} - 2 \times 1.25 \mu\text{M})^2} \quad (2)$$

$$K_{12} = \frac{[Zn(Hk)_2]}{[Zn^{2+}_{0.5}] \times [Hk]^2} \quad (3)$$

### Spectrophotometric determination of the $pK_a$ values of cysteine thiols

The  $pK_a$  values of the cysteine thiols of Hk4-Hk45 were determined spectrophotometrically at 220 nm (Jasco J-760). The 100  $\mu\text{M}$  peptide solutions in degassed 0.1 M  $\text{NaClO}_4$  were titrated with concentrated NaOH in the pH range of 6–10.5 at 25°C. The dissociation constants ( $pK_{a1}^{\text{SH}}$ ,  $pK_{a2}^{\text{SH}}$ ) were obtained by data fitting to a two-binding-event equation, as described previously.<sup>7</sup> Similarly, the conditional dissociation constants of thiols in the presence of  $Zn^{2+}$  ( $pK_a'$ ) were determined by the pH-titration of 10  $\mu\text{M}$  Hk4-Hk14 and Hk45 solutions with 4.95  $\mu\text{M}$   $Zn^{2+}$  in the pH range of 2.5–9. Absorbance values at 220 nm, corresponding to the formation of the ligand metal charge transfer (LMCT) bands of the complexes, were fitted to the logarithmic-form Hill's equation, as described elsewhere.<sup>8</sup>

### Nuclear magnetic resonance (NMR) spectroscopy

NMR measurements of 5 mM  $Zn(Hk6)_2$ ,  $Zn(Hk10)_2$ ,  $Zn(Hk12)_2$  and  $Zn(Hk14)_2$  and metal-free Hk14 were performed in degassed 10%  $\text{D}_2\text{O}$  in  $\text{H}_2\text{O}$  (pH 7.4) on a DDR2 Agilent 600 MHz spectrometer equipped with a Penta probe.<sup>9</sup> The temperature coefficients of amide protons were derived from a series of 1D  $^1\text{H}$  NMR spectra measured in the 5–35°C range. The exchange of amide protons with solvent was measured using the progressive saturation method.<sup>10</sup> Eight data points with presaturation times in the range of 0.1–8 s were collected. The sum of interscan delay and presaturation time was kept constant at 8 s. The exchange ( $k_{\text{ex}}$ ) and longitudinal ( $\rho$ ) relaxation rates of the amide protons were fit to the amide proton

signal intensities.<sup>11</sup> Amide proton accessibility to solvent was described in the framework of protection factors.<sup>12</sup> The 2D homonuclear total correlation spectroscopy (TOCSY) (mixing time 80 ms)<sup>13</sup>, rotating-frame nuclear Overhauser effect (ROESY) (mixing time 300 ms)<sup>14</sup> and heteronuclear  $^1\text{H}/^{15}\text{N}$  and  $^1\text{H}/^{13}\text{C}$  heteronuclear single quantum coherence (HSQC) ( $^{13}\text{C}$  HSQC was recorded with the offset, spectral widths, and  $^{13}\text{C}$ - $^1\text{H}$  coupling constant adjusted to aliphatic carbons)<sup>15</sup> spectra recorded at 25°C were used to obtain assignments of the  $^1\text{H}$ ,  $^{13}\text{C}$  and  $^{15}\text{N}$  resonances (Table S10). Time-domain data were acquired using States-TPPI quadrature detection.<sup>16</sup> All chemical shifts in  $^1\text{H}$  NMR spectra are reported with respect to external bis(succinimidyl)-2,2,7,7-tetramethyl-3-(1,3-dioxo-5-oxohexahydro-2H-indolizino[1,2-b]pyridine-6-yl)-5,6-dihydro-1H-benzotriazin-4(3H)-one (DSS-d4). The chemical shifts of the  $^{13}\text{C}$  and  $^{15}\text{N}$  signals were referenced indirectly using the 0.251449530 and 0.101329118 frequency ratios for  $^{13}\text{C}/^1\text{H}$  and  $^{15}\text{N}/^1\text{H}$ , respectively.<sup>17</sup> Zero filling and a 90°-shifted squared sine-bell filter were performed prior to Fourier transformation. Processed spectra were analyzed with SPARKY software.<sup>18</sup>

### **Structural calculations**

The standard approach to structural calculations for a zinc hook complex with the Hk14 peptide based on automatic assignment of interproton distances derived from the 2D ROESY spectrum failed because of the ambiguity of intrasubunit and intersubunit signals and the high symmetry of the homodimer complex.<sup>19</sup> Therefore, the available Rad50 protein crystallographic structure (PDB ID: 1L8D) was investigated as a model in our structural analysis.<sup>20</sup> A list of possible through-space correlations was prepared for a corresponding fragment (protons were added to the respective structure fragment with WHATIF).<sup>21</sup> Pairs of closely spaced protons ( $d \leq 5 \text{ \AA}$ ) were used to create the list of distances for comparison with the list of peaks obtained from the ROESY spectrum.

### **Hydrogen-deuterium exchange mass spectrometry (HDX MS)**

The experiments were conducted in the exchange mode, e.g., hydrogen into deuterium. The spectra for each zinc hook peptide were measured under four conditions: peptide in  $\text{H}_2\text{O}$ , peptide- $\text{Zn}^{2+}$  complex in  $\text{H}_2\text{O}$ , peptide in  $\text{D}_2\text{O}$  and peptide- $\text{Zn}^{2+}$  complex in  $\text{D}_2\text{O}$ . The samples measured by ion trap were prepared by mixing the peptide and  $\text{ZnCl}_2$  at a 5:1 molar ratio at a peptide concentration of ~ 50 nM in 10-mM  $(\text{NH}_4)_2\text{CO}_3$  pH 7.4 in  $\text{D}_2\text{O}$  or  $\text{H}_2\text{O}$  in a final volume of 200  $\mu\text{l}$ . Mass spectra were measured on an amaZon SL ion trap spectrometer (Bruker, Germany) in electron-transfer dissociation (ETD) fragmentation mode using a

capillary voltage of 4 000 V, an end plate offset of -500 V, a flow rate of 5.00  $\mu\text{l}/\text{min}$ , a nebulizer pressure of 10.0 psi, and a dry argon flow rate of 3.0 l/min at 150°C in positive ion mode. The ETD fragmentation spectra of the ions of interest were recorded with the amplitude refined for each parent ion. The collision-induced dissociation (CID) spectra of the Hk14 complex were also collected using a Maxis Impact qTOF spectrometer (Bruker, Germany) with standard settings in positive ion mode (capillary voltage 2 000 V, end plate offset -500 V, nebulizer 0.5 bar, dry argon 4.0 l/min, 180°C). The collision energy was adjusted for each parent ion to obtain a good fragmentation spectrum. Samples measured by quadrupole time of flight (qTOF) were diluted directly before measurement by a factor of 4,000 to prevent detector saturation. The spectra recorded for peptides and their complexes in  $\text{H}_2\text{O}$  were treated as the reference and control in terms of fragmentation. For each deuterated sample, isotopic profiles of 1:1 and 1:2 metal-to-peptide complexes were compared with the theoretical isotopic profile of fully deuterated species, and the signals corresponding to complexes with various numbers of protected protons were analyzed. Subsequently, fragmentation ions were analyzed in the same manner. Comparison of the number of protected protons in each fragmentation peak and the peptide sequence provided information regarding possible hydrogen bond donor locations.

### **Isothermal titration calorimetry (ITC)**

The binding of  $\text{Zn}^{2+}$  to Hk peptides was monitored using a nano-ITC calorimeter (TA Waters, USA) at 25°C with a cell volume of 1 ml. All experiments were performed in HEPES buffer ( $I = 0.1 \text{ M}$  from NaCl) at pH 7.4 under an argon atmosphere. The Hk peptide (titrant) concentration was 1.3 mM, whereas the metal (titrate) concentration was 50  $\mu\text{M}$ . After temperature equilibration, successive injections of the titrant were made into the reaction cell with 6.82  $\mu\text{l}$  increments at 400 s intervals with stirring at 200 rpm. Control experiments to determine the heats of titrant dilution were performed using identical injections in the absence of  $\text{Zn}^{2+}$ . The net reaction heat was obtained by subtracting the heat of dilution from the corresponding total heat of reaction. The titration data were analyzed using NanoAnalyze (version 3.3.0) and Origin software (version 8.1) and were fitted to a sequential binding model to account for the formation of  $\text{ZnHk}$  and  $\text{Zn(Hk)}_2$  during the course of titration.

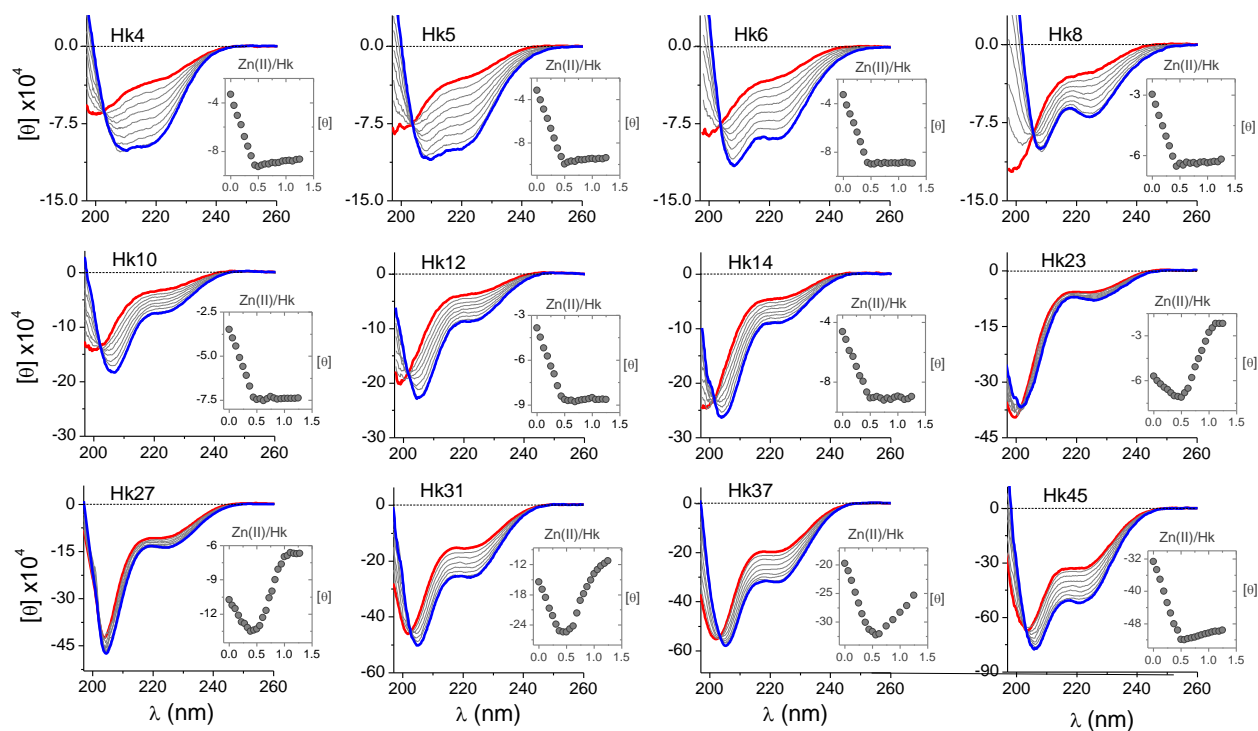

**Figure S1.** Spectropolarimetric titrations of zinc hook peptides with  $\text{Zn}^{2+}$  in 5 mM Tris buffer at pH 7.4, 25°C,  $I = 0.1$  M (from  $\text{NaClO}_4$ ) with 100  $\mu\text{M}$  TCEP. Red and blue indicate free peptide and a  $\text{Zn}^{2+}$ -to-peptide molar ratio of 0.5:1 ( $\text{Zn}(\text{Hk})_2$  complex), respectively. Spectra collected at higher ratios are omitted for clarity. Insets present the dependence of the ellipticity on the reactant molar ratio, as monitored at 222 nm.



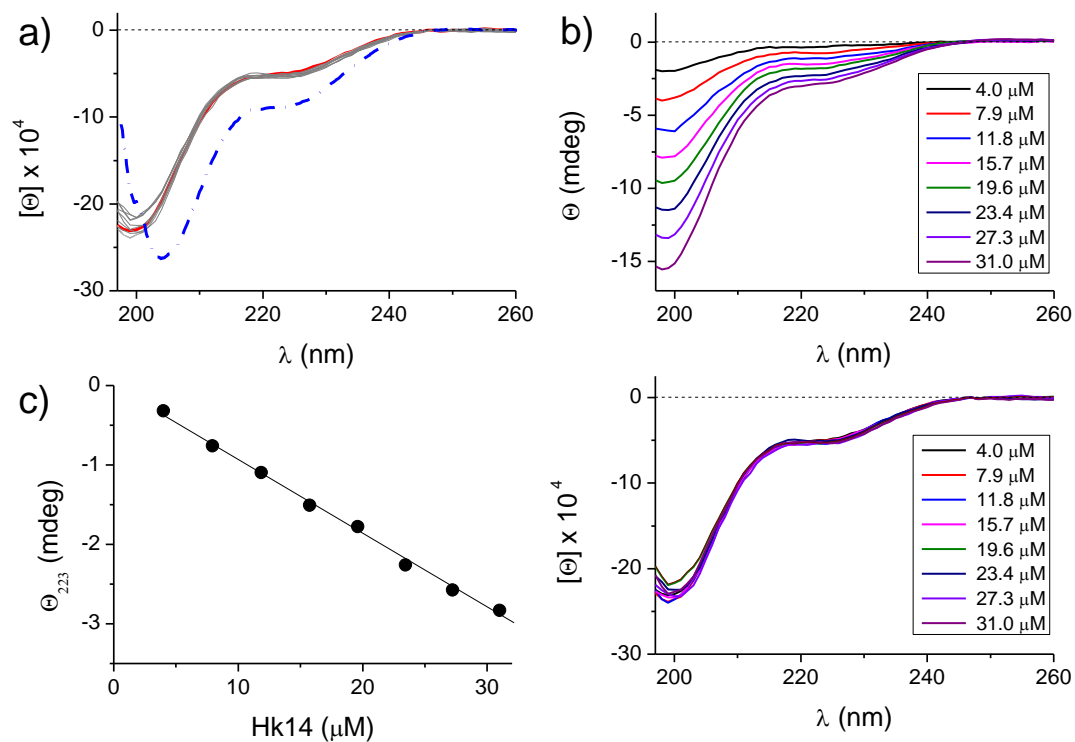

**Figure S2.** CD titrations of Hk14 in the absence of  $Zn^{2+}$  ions; a) Spectra of 15  $\mu M$  Hk14 titrated with HEPES buffer, pH 7.4; b) Spectra of Hk14 peptide recorded at different concentrations; c) Dependence of ellipticity of Hk14 as a function of peptide concentration; d) CD spectra of Hk14 recorded at different concentrations (see graph c) converted to molar ellipticity  $[\Theta]$  ( $cm^2 \text{ dmol}^{-1}$ ).

**Table S1.** Cumulative protonation and Zn<sup>2+</sup> stability constants ( $\log \beta_{ijk}$ )<sup>a</sup> of zinc hook peptide complexes determined potentiometrically at 25°C,  $I = 0.1$  M (from KNO<sub>3</sub>).<sup>b</sup> *n.d.* denotes not determined under the used conditions.

| $\log \beta_{ijk}$              | Zinc hook peptide |          |          |             |             |             |             |
|---------------------------------|-------------------|----------|----------|-------------|-------------|-------------|-------------|
|                                 | Hk4               | Hk5      | Hk6      | Hk8         | Hk10        | Hk12        | Hk14        |
| HL                              | 9.362(9)          | 9.15(1)  | 8.98(1)  | 10.63(2)    | 10.64(2)    | 10.71(3)    | 10.74(3)    |
| H <sub>2</sub> L                | 17.54(1)          | 17.19(1) | 16.79(1) | 19.51(2)    | 19.53(3)    | 20.88(3)    | 21.27(1)    |
| H <sub>3</sub> L                | -                 | -        | -        | 27.25(3)    | 26.89(3)    | 29.69(3)    | 30.26(2)    |
| H <sub>4</sub> L                | -                 | -        | -        | 31.50(2)    | 31.08(4)    | 37.07(4)    | 37.65(2)    |
| H <sub>5</sub> L                | -                 | -        | -        | -           | -           | 41.27(7)    | 42.14(3)    |
| H <sub>6</sub> L                | -                 | -        | -        | -           | -           | -           | 45.69(3)    |
| ZnH <sub>2</sub> L              | -                 | -        | -        | -           | -           | 31.91(6)    | 32.51(4)    |
| ZnHL                            | -                 | -        | -        | 20.8(1)     | 21.70(5)    | -           | -           |
| ZnL                             | 10.17(5)          | 9.63(8)  | 9.83(8)  | -           | -           | -           | -           |
| ZnH <sub>4</sub> L <sub>2</sub> | -                 | -        | -        | -           | -           | 64.18(4)    | 65.52(5)    |
| ZnH <sub>3</sub> L <sub>2</sub> | -                 | -        | -        | -           | -           | 55.61(8)    | 56.25(7)    |
| ZnH <sub>2</sub> L <sub>2</sub> | -                 | -        | -        | 43.02(4)    | 43.47(3)    | 45.38(9)    | 45.75(6)    |
| ZnHL <sub>2</sub>               | -                 | -        | -        | 33.39(8)    | 33.97(7)    | 34.3(1)     | <i>n.d.</i> |
| ZnL <sub>2</sub>                | 20.55(3)          | 20.33(3) | 20.71(1) | <i>n.d.</i> | <i>n.d.</i> | <i>n.d.</i> | <i>n.d.</i> |

<sup>a</sup>  $\beta_{M_iH_jL_k} = [M_iH_jL_k]/([M]^i[H]^j[L]^k)$ , where [L] is the concentration of fully deprotonated zinc hook peptide.

<sup>b</sup> Standard deviations are given as provided by SUPERQUAD calculations and refer to the last digit.(1)

**Procedure of the calculation of formation constant ( $\log K_{12}$ ) for  $\text{Zn(Hk14)}_2$  based on potentiometric protonation and stability constants derived from potentiometric titrations presented in Table S1:**

a) Use any simulation and speciation software (e.g. Hyperquad) to calculate concentration values of  $[\text{Zn}^{2+}]$  (free  $\text{Zn}^{2+}$ ),  $[\text{Zn(Hk)}_2]$  (complex in equilibrium) and  $[\text{Hk}]$  (free ligand). For that purpose prepare input file with all protonation constants and stability constants listed for any hook peptide listed in Table S1. Define total concentrations of the reagents, for example 5  $\mu\text{M}$  of the peptide and 1.25  $\mu\text{M}$  of total  $\text{Zn}^{2+}$ . Define pH range or pH of interest for which speciation should be calculated. Run the calculations.

b) Use calculated values of  $[\text{Zn}^{2+}]$ ,  $[\text{Zn(Hk)}_2]$  and  $[\text{Hk}]$  concentrations at pH of interest (e.g. 7.4) to calculate the formation constant for that pH according to the following equation:

$$K_{12} = \frac{[\text{Zn(Hk)}_2]}{[\text{Zn}^{2+}][\text{Hk}]^2}$$

In the case of Hk14 and pH 7.4 one obtains:  $[\text{Zn}^{2+}] = 1.28 \times 10^{-14}$  M,  $[\text{Zn(Hk14)}_2] = 1.25 \times 10^{-6}$  M and  $[\text{Hk14}] = 2.5 \times 10^{-6}$  M and  $K_{12} = 1.56 \times 10^{19}$ . Logarithmic value of  $K_{12}$ ,  $\log K_{12} = 19.19$ . The value corresponds to that listed in Table 1 in the main manuscript.

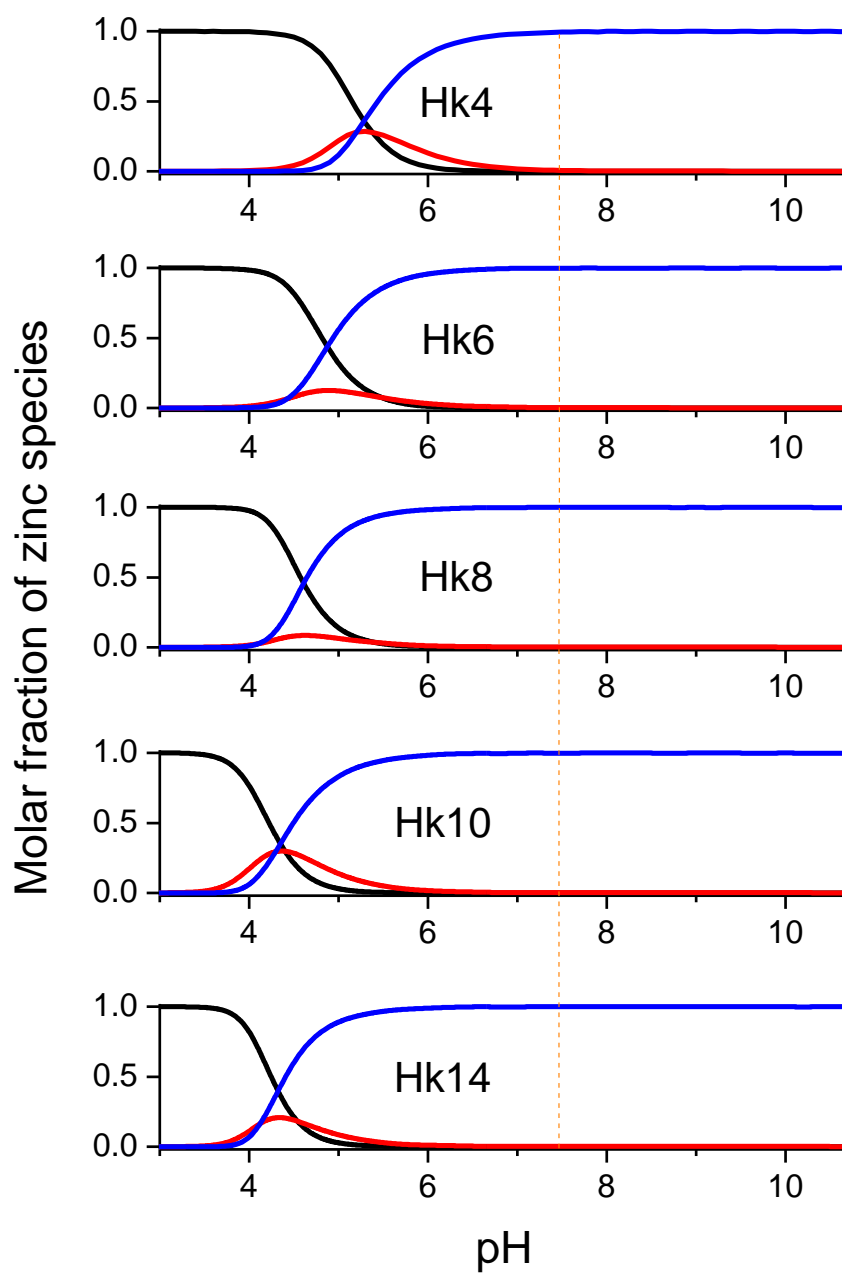

**Figure S3.** Speciation plots of selected zinc hook peptides for different reactant concentrations used in the potentiometric studies: 1 mM hook peptide and 0.5 mM  $\text{Zn}^{2+}$ . Black, red and blue lines represent unbound  $\text{Zn}^{2+}$ , monomeric ( $\text{ZnHk}$ ) and dimeric ( $\text{Zn}(\text{Hk})_2$ ) fractions, respectively. The orange line corresponds to pH 7.4.

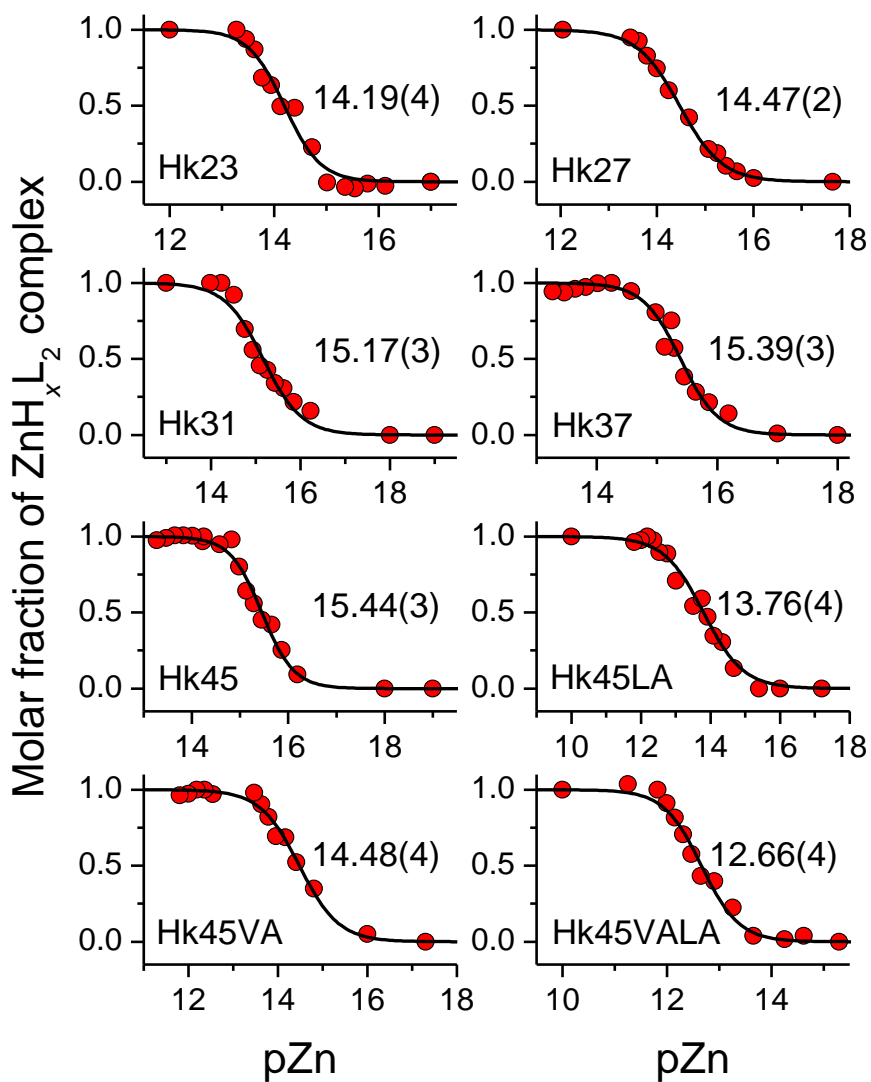

**Figure S4.** Isotherms of  $\text{Zn}^{2+}$  binding to Hk23, Hk27, Hk31, Hk37, Hk45, Hk45LA, Hk45VA, and Hk45LAVA zinc hook peptides in the presence of zinc chelators.

**Table S2.**  $^1\text{H}$  chemical shifts of  $\text{Zn}^{2+}$ - complexes of zinc hook peptides in ppm.

| Zinc hook peptide | Atom name             | Hk14                  | Hk10                  | Hk8            | Hk6            |
|-------------------|-----------------------|-----------------------|-----------------------|----------------|----------------|
| acetyl group      | $\text{H}_\text{M}$   | 1.990                 | 2.02                  | 2.009          | 1.854          |
| Ala440            | $\text{H}_\text{N}$   | 8.265                 | not applicable        | not applicable | not applicable |
|                   | $\text{H}_\alpha$     | 4.248                 |                       |                |                |
|                   | $\text{H}_\beta$      | 1.338                 |                       |                |                |
| Lys441            | $\text{H}_\text{N}$   | 8.386                 |                       |                |                |
|                   | $\text{H}_\alpha$     | 4.343                 |                       |                |                |
|                   | $\text{H}_\beta$      | 1.731; 1.854          |                       |                |                |
|                   | $\text{H}_\gamma$     | 1.464; 1.402          |                       |                |                |
|                   | $\text{H}_\delta$     | 1.639                 |                       |                |                |
|                   | $\text{H}_\epsilon$   | 2.968                 |                       |                |                |
| Gly442            | $\text{H}_\text{N}$   | 8.392                 |                       |                |                |
|                   | $\text{H}_\alpha$     | 3.986                 | 4.011; 3.898          |                |                |
| Lys443            | $\text{H}_\text{N}$   | 8.156                 | 8.200                 | 8.197          |                |
|                   | $\text{H}_\alpha$     | 4.577                 | 4.576                 | 4.206          |                |
|                   | $\text{H}_\beta$      | 1.465; 1.395          | 1.469; 1.396          | 1.492          |                |
|                   | $\text{H}_\gamma$     | 1.279; 1.147          | 1.283; 1.155          | 1.212; 1.150   |                |
|                   | $\text{H}_\delta$     | 1.586                 | 1.583                 | 1.607          |                |
|                   | $\text{H}_\epsilon$   | 2.956                 | 2.958                 | 2.959          |                |
| Cys444            | $\text{H}_\text{N}$   | 8.634                 | 8.667                 | 8.424          | 8.197          |
|                   | $\text{H}_\alpha$     | 4.572                 | 4.559                 | 4.689          | 4.667          |
|                   | $\text{H}_\beta$      | 2.655; 3.257          | 2.657; 3.252          | 2.802; 3.315   | 3.251; 2.774   |
| Pro445            | $\text{H}_\alpha$     | 4.429                 | 4.424                 | 4.431          | 4.432          |
|                   | $\text{H}_\beta$      | 2.360; 2.060          | 2.376; 2.050          | 2.360; 2.041   | 2.356; 2.018   |
|                   | $\text{H}_\gamma$     | 2.156; 1.989          | 2.144; 1.981          | 2.118; 1.988   | 2.103; 2.007   |
|                   | $\text{H}_\delta$     | 3.930; 4.312          | 3.922; 4.303          | 3.944; 4.237   | 4.205; 3.915   |
|                   | $\text{H}_\epsilon$   |                       |                       |                |                |
| Val446            | $\text{H}_\text{N}$   | 8.704                 | 8.709                 | 8.874          | 8.889          |
|                   | $\text{H}_\alpha$     | 4.116                 | 4.1091                | 4.056          | 4.030          |
|                   | $\text{H}_\beta$      | 1.997                 | 1.986                 | 1.941          | 1.989          |
|                   | $\text{H}_{\gamma 1}$ | 0.966                 | 0.964                 | 0.958          | 0.954          |
|                   | $\text{H}_{\gamma 2}$ | 0.944                 | 0.934                 | 0.960          | 0.958          |
| Cys447            | $\text{H}_\text{N}$   | 8.216                 | 8.235                 | 8.308          | 8.285          |
|                   | $\text{H}_\alpha$     | 4.916                 | 4.898                 | 4.923          | 4.902          |
|                   | $\text{H}_\beta$      | 2.903; 3.235          | 2.901; 3.215          | 2.944; 3.139   | 3.137; 2.921   |
| Gly448            | $\text{H}_\text{N}$   | 7.712                 | 7.723                 | 7.823          | 7.977          |
|                   | $\text{H}_\alpha$     | 3.865; 4.114          | 3.854; 4.109          | 3.862; 4.112   | 4.078; 3.917   |
| Arg449            | $\text{H}_\text{N}$   | 7.909                 | 7.962                 | 7.962          | 8.403          |
|                   | $\text{H}_\alpha$     | 4.401                 | 4.374                 | 4.374          | 4.339          |
|                   | $\text{H}_\beta$      | 1.781; 1.908          | 1.785; 1.918          | 1.785; 1.918   | 1.886; 1.775   |
|                   | $\text{H}_\gamma$     | 1.769                 | 1.737                 | 1.737          | 1.759; 1.613   |
|                   | $\text{H}_\delta$     | 3.177; 3.260          | 3.103; 3.252          | 3.103; 3.252   | 3.152          |
| Glu450            | $\text{H}_\text{N}$   | not assigned          | not assigned          | 8.621          | not applicable |
|                   | $\text{H}_\alpha$     | 4.238                 | 4.224                 | 4.358          |                |
|                   | $\text{H}_\beta$      | 1.974                 | 1.971; 2.314          | 1.964; 1.883   |                |
|                   | $\text{H}_\gamma$     | 2.296                 | 2.314                 | 2.179          |                |
| Leu451            | $\text{H}_\text{N}$   | 8.473                 | 8.529                 | not applicable |                |
|                   | $\text{H}_\alpha$     | 4.346                 | 4.234                 |                |                |
|                   | $\text{H}_\beta$      | 1.481; 1.545<br>1.460 | 1.471; 1.550<br>1.479 |                |                |

|                       |                 |              |                |       |       |
|-----------------------|-----------------|--------------|----------------|-------|-------|
|                       | H <sub>γ</sub>  | 0.783        | 0.766          |       |       |
|                       | H <sub>δ1</sub> | 0.863        | 0.840          |       |       |
|                       | H <sub>δ2</sub> |              |                |       |       |
| Thr452                | H <sub>N</sub>  | 8.265        | not applicable |       |       |
|                       | H <sub>α</sub>  | 4.346        |                |       |       |
|                       | H <sub>β</sub>  | 4.247        |                |       |       |
|                       | H <sub>γ2</sub> | 1.181        |                |       |       |
| Asp453                | H <sub>N</sub>  | 8.322        |                |       |       |
|                       | H <sub>α</sub>  | 4.597        |                |       |       |
|                       | H <sub>β</sub>  | 2.635; 2.665 |                |       |       |
| NH <sub>2</sub> group | H <sub>1</sub>  | 7.488        | 7.777          | 7.666 | 7.750 |
|                       | H <sub>2</sub>  | 7.053        | 7.113          | 6.965 | 7.150 |

**Table S3.**  $^{13}\text{C}$  and  $^{15}\text{N}$  chemical shifts of  $\text{Zn}^{2+}$  complexes of zinc hook peptides in ppm.

| Zinc hook peptide | atom name             | Hk14         | Hk10           | Hk8            | Hk6            |
|-------------------|-----------------------|--------------|----------------|----------------|----------------|
| acetyl group      | $\text{C}_\text{M}$   | 24.47        | 24.58          | 24.44          | 24.06          |
| Ala440            | $\text{N}_\text{H}$   | 120.16       | not applicable | not applicable | not applicable |
|                   | $\text{C}_\alpha$     | 56.14        |                |                |                |
|                   | $\text{C}_\beta$      | 19.32        |                |                |                |
| Lys441            | $\text{N}_\text{H}$   | 120.16       |                |                |                |
|                   | $\text{C}_\alpha$     | 56.14        |                |                |                |
|                   | $\text{C}_\beta$      | 33.34        |                |                |                |
|                   | $\text{C}_\gamma$     | 35.29        |                |                |                |
|                   | $\text{C}_\delta$     | 28.95        |                |                |                |
| Gly442            | $\text{C}_\epsilon$   | 42.12        |                |                |                |
|                   | $\text{N}_\text{H}$   | 109.15       |                |                |                |
|                   | $\text{C}_\alpha$     | 45.03        | 45.08          |                |                |
| Lys443            | $\text{N}_\text{H}$   | 118.99       | 119.12         | 126.88         |                |
|                   | $\text{C}_\alpha$     | not assigned | not assigned   | 55.93          |                |
|                   | $\text{C}_\beta$      | not assigned | 35.21          | 33.77          |                |
|                   | $\text{C}_\gamma$     | 24.94        | 24.90          | 25.04          |                |
|                   | $\text{C}_\delta$     | 29.25        | 29.14          | 29.44          |                |
|                   | $\text{C}_\epsilon$   | 42.15        | 42.11          | 42.06          |                |
| Cys444            | $\text{N}_\text{H}$   | 127.09       | 127.48         | 129.28         | 130.977        |
|                   | $\text{C}_\alpha$     | not assigned | not assigned   | not assigned   | not assigned   |
|                   | $\text{C}_\beta$      | 31.4         | 31.44          | 31.93          | 32.099         |
| Pro445            | $\text{C}_\alpha$     | 64.33        | 64.29          | 64.16          | 64.41          |
|                   | $\text{C}_\beta$      | 32.53        | 32.54          | 32.42          | 32.19          |
|                   | $\text{C}_\gamma$     | 27.19        | 27.18          | 27.22          | 27.25          |
|                   | $\text{C}_\delta$     | 51.81        | 51.74          | 51.70          | 51.46          |
| Val446            | $\text{N}_\text{H}$   | 121.60       | 121.61         | 122.03         | 122.17         |
|                   | $\text{C}_\alpha$     | 65.18        | 65.14          | 65.38          | 65.32          |
|                   | $\text{C}_\beta$      | 32.95        | 32.96          | 33.00          | not assigned   |
|                   | $\text{C}_{\gamma 1}$ | 21.73        | 21.77          | 21.58          | 21.76          |
|                   | $\text{C}_{\gamma 2}$ | 23.43        | 23.43          | 22.92          | 22.89          |
| Cys447            | $\text{N}_\text{H}$   | 118.43       | 118.,          | 118.51         | 118.845        |
|                   | $\text{C}_\alpha$     | not assigned | not assigned   | not assigned   | not assigned   |
|                   | $\text{C}_\beta$      | 31.42        | 31.60          | 31.96          | 31.96          |
| Gly448            | $\text{N}_\text{H}$   | 111.58       | 111.58         | 112.24         | 112.39         |
|                   | $\text{C}_\alpha$     | 46.58        | 46.50          | 46.41          | 46.15          |
| Arg449            | $\text{N}_\text{H}$   | 120.57       | 120.80         | 121.36         | 122.07         |
|                   | $\text{C}_\alpha$     | 56.25        | 56.45          | 57.05          | 56.33          |
|                   | $\text{C}_\beta$      | 31.63        | 31.56          | 31.19          | 31.13          |
|                   | $\text{C}_\gamma$     | 27.73        | 27.69          | 29.09          | 27.86          |
|                   | $\text{C}_\delta$     | 43.54        | 43.46          | 43.53          | 43.61          |
| Glu450            | $\text{N}_\text{H}$   | not assigned | not assigned   | 121.86         | not applicable |
|                   | $\text{C}_\alpha$     | not assigned | 57.61          | 55.74          |                |
|                   | $\text{C}_\beta$      | 30.10        | 29.83          | 31.63          |                |
|                   | $\text{C}_\gamma$     | 36.59        | 36.41          | 36.38          |                |
| Leu451            | $\text{N}_\text{H}$   | 126.09       | 126.58         | not applicable |                |
|                   | $\text{C}_\alpha$     | 55.23        | 55.32          |                |                |
|                   | $\text{C}_\beta$      | 42.25        | 42.64          |                |                |
|                   |                       | 27.34        | 27.41          |                |                |



|                       |                 |              |                |        |       |
|-----------------------|-----------------|--------------|----------------|--------|-------|
|                       | C <sub>γ</sub>  | 25.41        | 25.19          |        |       |
|                       | C <sub>δ1</sub> | 23.22        | 23.10          |        |       |
|                       | C <sub>δ2</sub> |              |                |        |       |
| Thr452                | N <sub>H</sub>  | 129.94       | not applicable |        |       |
|                       | C <sub>α</sub>  | 61.71        |                |        |       |
|                       | C <sub>β</sub>  | 69.92        |                |        |       |
|                       | C <sub>γ2</sub> | 21.51        |                |        |       |
| Asp453                | N <sub>H</sub>  | 122.85       |                |        |       |
|                       | C <sub>α</sub>  | not assigned |                |        |       |
|                       | C <sub>β</sub>  | 41.51        |                |        |       |
| NH <sub>2</sub> group | N               | 107.39       | 107.22         | 108.39 | 108.2 |

**Table S4.** Experimentally determined values of exchange rates ( $k_{\text{ex}}$ ) and longitudinal relaxation rates ( $\rho$ ) of amide protons ( $\text{H}_\text{N}$ ) for  $\text{Zn}^{2+}$  complexes with Hk6-Hk10 and Hk14 zinc hook peptides and simulated values for Hk14, assuming random-coil conformation at pH 7.4 and 25°C. *n.a.* and *n.d.* denote not applicable and not determined, respectively.

| Proton amide | Hk6                                 |                            | Hk8                                 |                            | Hk10                                |                            | Hk14                                |                            | Hk14 random coil                    |
|--------------|-------------------------------------|----------------------------|-------------------------------------|----------------------------|-------------------------------------|----------------------------|-------------------------------------|----------------------------|-------------------------------------|
|              | $k_{\text{ex}}$ ( $\text{s}^{-1}$ ) | $\rho$ ( $\text{s}^{-1}$ ) | $k_{\text{ex}}$ ( $\text{s}^{-1}$ ) | $\rho$ ( $\text{s}^{-1}$ ) | $k_{\text{ex}}$ ( $\text{s}^{-1}$ ) | $\rho$ ( $\text{s}^{-1}$ ) | $k_{\text{ex}}$ ( $\text{s}^{-1}$ ) | $\rho$ ( $\text{s}^{-1}$ ) | $k_{\text{ex}}$ ( $\text{s}^{-1}$ ) |
| Ala440       | <i>n.a.</i>                         | <i>n.a.</i>                | <i>n.a.</i>                         | <i>n.a.</i>                | <i>n.a.</i>                         | <i>n.a.</i>                | 0.211(4) <sup>a</sup>               | 0.82(2) <sup>a</sup>       | <i>n.a.</i> <sup>e</sup>            |
| Lys441       | <i>n.a.</i>                         | <i>n.a.</i>                | <i>n.a.</i>                         | <i>n.a.</i>                | <i>n.a.</i>                         | <i>n.a.</i>                | 14(2) <sup>b</sup>                  | 3.2(2) <sup>b</sup>        | 40.74                               |
| Gly442       | <i>n.a.</i>                         | <i>n.a.</i>                | <i>n.a.</i>                         | <i>n.a.</i>                | 16.3(3)                             | 1.16(2)                    | 14(2) <sup>b</sup>                  | 3.2(2) <sup>b</sup>        | 109.64                              |
| Lys443       | <i>n.a.</i>                         | <i>n.a.</i>                | 2.54(2)                             | 1.57(1)                    | 10.8(3)                             | 2.15(2)                    | 6.4(2)                              | 0.90(3)                    | 60.25                               |
| Cys444       | 3.63(1)                             | 1.736(3)                   | 0.81(2)                             | 1.71(3)                    | 0.608(5)                            | 1.46(1)                    | 0.65(1)                             | 1.18(2)                    | 245.46                              |
| Pro445       | <i>n.a.</i>                         | <i>n.a.</i>                | <i>n.a.</i>                         | <i>n.a.</i>                | <i>n.a.</i>                         | <i>n.a.</i>                | <i>n.a.</i>                         | <i>n.a.</i>                | <i>n.a.</i>                         |
| Val446       | 0.143(3)                            | 1.36(3)                    | 0.201(5)                            | 1.38(3)                    | 0.047(5)                            | 0.77(7)                    | 0.146(5)                            | 0.80(2)                    | 5.13                                |
| Cys447       | 0.89(2)                             | 1.82(4)                    | 0.37(2)                             | 1.43(5)                    | 0.084(2)                            | 0.91(2)                    | 0.211(4) <sup>a</sup>               | 0.82(2) <sup>a</sup>       | 134.89                              |
| Gly448       | 4.93(4)                             | 1.883(3)                   | 0.443(5)                            | 1.43(1)                    | 0.108(6)                            | 0.87(5)                    | 0.266(7)                            | 0.81(2)                    | 295.11                              |
| Arg449       | 11.2(4)                             | 1.93(2)                    | 1.07(2)                             | 3.6(3)                     | 0.355(3)                            | 1.30(1)                    | 0.34(2)                             | 0.91(4)                    | 79.43                               |
| Glu450       | <i>n.a.</i>                         | <i>n.a.</i>                | 8(2)                                | <i>n.d.</i> <sup>c</sup>   | <i>n.d.</i> <sup>c</sup>            | <i>n.d.</i> <sup>c</sup>   | <i>n.d.</i> <sup>c</sup>            | <i>n.d.</i> <sup>c</sup>   | 22.91                               |
| Leu451       | <i>n.a.</i>                         | <i>n.a.</i>                | <i>n.a.</i>                         | <i>n.a.</i>                | 1.16(3)                             | 1.86 ± 0.03                | 0.94(3)                             | 1.60(4)                    | 8.32                                |
| Thr452       | <i>n.a.</i>                         | <i>n.a.</i>                | <i>n.a.</i>                         | <i>n.a.</i>                | <i>n.a.</i>                         | <i>n.a.</i>                | 0.211(4) <sup>a</sup>               | 0.82(2) <sup>a</sup>       | 23.44                               |
| Asp453       | <i>n.a.</i>                         | <i>n.a.</i>                | <i>n.a.</i>                         | <i>n.a.</i>                | <i>n.a.</i>                         | <i>n.a.</i>                | 13.2(2)                             | 1.47(1)                    | 35.48                               |

<sup>a</sup> Three amide protons of  $\text{Zn}(\text{Hk14})_2$  with undistinguishable proton chemical shifts. <sup>b</sup> Two amide protons of  $\text{Zn}(\text{Hk14})_2$  with undistinguishable proton chemical shifts. <sup>c</sup> The amide signal of Glu450 was too broadened to measure its  $k_{\text{ex}}$  and  $\rho$ . <sup>d</sup> Simulated exchange rates of the amide protons of Hk14 with solvent, calculated for random coil peptides assuming 25°C and pH 7.4. <sup>e</sup> Calculation model for exchange rates considering only the preceding residue.

**Table S5.** Values of protection factors and temperature coefficients calculated for Zn<sup>2+</sup> complexes with Hk6, Hk8, Hk10 and Hk12 zinc hook peptides at pH 7.4 and 25°C. *n.a.* and *n.d.* denote not applicable and not determined, respectively.

| Proton amide | Hk6                      |                                 | Hk8                      |                                 | Hk10                     |                                 | Hk14                     |                                 |
|--------------|--------------------------|---------------------------------|--------------------------|---------------------------------|--------------------------|---------------------------------|--------------------------|---------------------------------|
|              | Protection factor        | - $\Delta\delta/\Delta T$ (ppb) | Protection factor        | - $\Delta\delta/\Delta T$ (ppb) | Protection factor        | - $\Delta\delta/\Delta T$ (ppb) | Protection factor        | - $\Delta\delta/\Delta T$ (ppb) |
| Ala440       | <i>n.a.</i>              | <i>n.a.</i>                     | <i>n.a.</i>              | <i>n.a.</i>                     | <i>n.a.</i>              | <i>n.a.</i>                     | <i>n.d.</i> <sup>b</sup> | 9.4                             |
| Lys441       | <i>n.a.</i>              | <i>n.a.</i>                     | <i>n.a.</i>              | <i>n.a.</i>                     | <i>n.a.</i>              | <i>n.a.</i>                     | <i>n.d.</i> <sup>b</sup> | 8.6                             |
| Gly442       | <i>n.a.</i>              | <i>n.a.</i>                     | <i>n.a.</i>              | <i>n.a.</i>                     | <i>n.d.</i> <sup>a</sup> | 8.7                             | <i>n.d.</i> <sup>b</sup> | 8.6                             |
| Lys443       | <i>n.a.</i>              | <i>n.a.</i>                     | <i>n.d.</i> <sup>a</sup> | 9.8                             | 6.00                     | 9.3                             | 9.40                     | 8.4                             |
| Cys444       | <i>n.d.</i> <sup>a</sup> | 7.2                             | 301.55                   | 5.5                             | 403.85                   | 2.1                             | 376.88                   | 1.6                             |
| Pro445       | <i>n.a.</i>              | <i>n.a.</i>                     | <i>n.a.</i>              | <i>n.a.</i>                     | <i>n.a.</i>              | <i>n.a.</i>                     | <i>n.a.</i>              | <i>n.a.</i>                     |
| Val446       | 35.87                    | 1.4                             | 25.57                    | 2.7                             | 108.46                   | 2.4                             | 35.11                    | 2.1                             |
| Cys447       | 151.39                   | 0.4                             | 365.55                   | 1                               | 1605.83                  | 1.5                             | <i>n.d.</i> <sup>b</sup> | 1.3                             |
| Gly448       | 59.91                    | 3.3                             | 665.56                   | 3.4                             | 2737.57                  | 2.2                             | 1109.44                  | 2.2                             |
| Arg449       | 7.12                     | 5.8                             | 74.30                    | 4.9                             | 223.62                   | 3.8                             | 230.90                   | 3.2                             |
| Glu450       | <i>n.a.</i>              | <i>n.a.</i>                     | 3.01                     | 6.8                             | <i>n.d.</i> <sup>b</sup> | <i>n.d.</i> <sup>b</sup>        | <i>n.d.</i> <sup>b</sup> | <i>n.d.</i> <sup>b</sup>        |
| Leu451       | <i>n.a.</i>              | <i>n.a.</i>                     | <i>n.a.</i>              | <i>n.a.</i>                     | 7.20                     | 7.2                             | 8.88                     | 5.8                             |
| Thr452       | <i>n.a.</i>              | <i>n.a.</i>                     | <i>n.a.</i>              | <i>n.a.</i>                     | <i>n.a.</i>              | <i>n.a.</i>                     | <i>n.d.</i> <sup>b</sup> | 9.4                             |
| Asp453       | <i>n.a.</i>              | <i>n.a.</i>                     | <i>n.a.</i>              | <i>n.a.</i>                     | <i>n.a.</i>              | <i>n.a.</i>                     | 2.68                     | <i>n.d.</i> <sup>b</sup>        |

<sup>a</sup> Calculation model considering only the preceding residue.

<sup>b</sup> Not determined because of signals overlapping or a lack of clear assignments (see footnote of Table S4).

a)

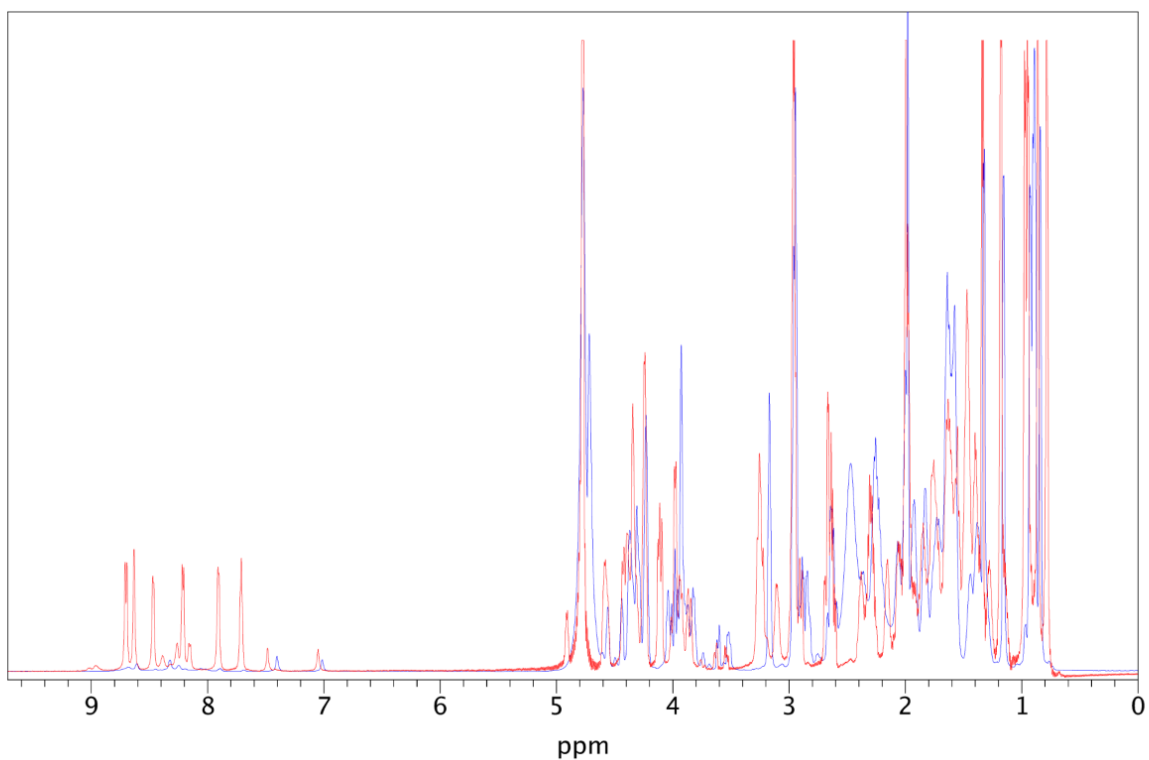

b)

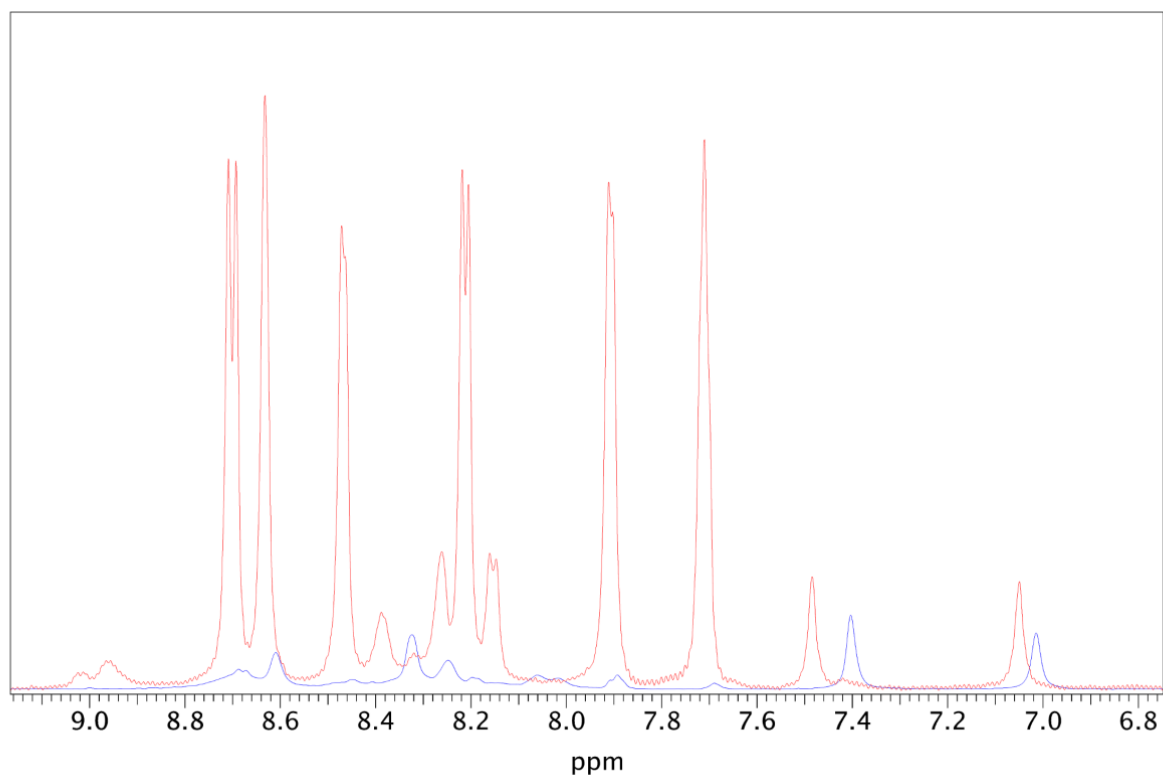

**Figure S5.** Overlaid 1D <sup>1</sup>H NMR spectra of free (blue) and Zn<sup>2+</sup> complexed (red) Hk14 peptides (spectra were determined with 1 s of saturation of the H<sub>2</sub>O signal). a) Full chemical shift range; b) amide region of 1D <sup>1</sup>H NMR spectra.

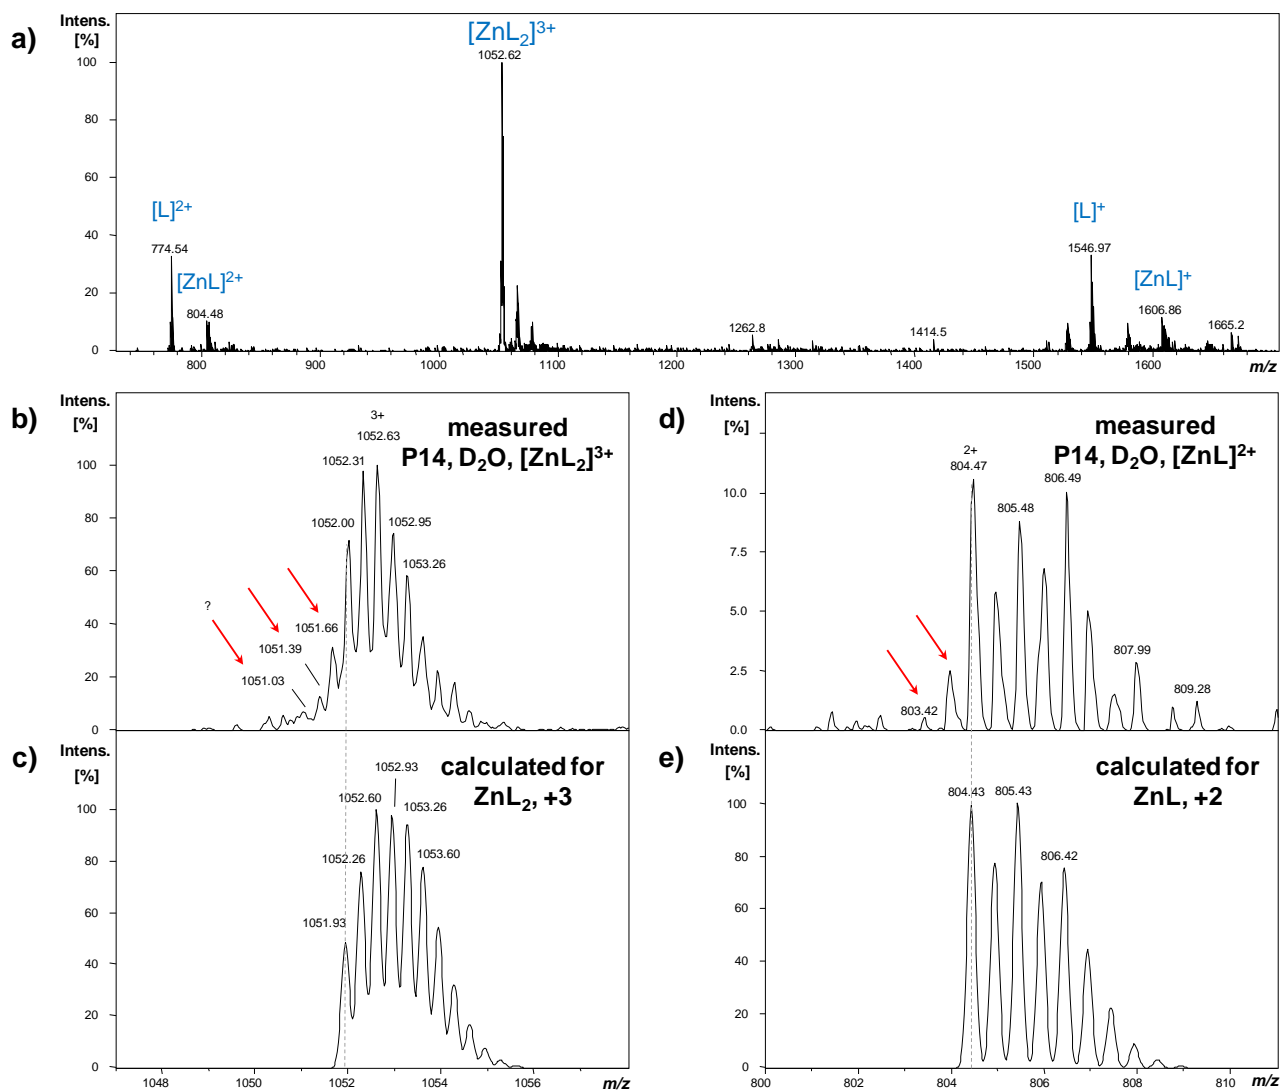

**Figure S6.** Example of HDX MS analysis: mass spectrum of Hk14 in D<sub>2</sub>O measured on an AmaZonSL (ion trap) instrument: a) full spectrum; b) measured isotopic profile of complex Zn(Hk14)<sub>2</sub> ([ZnL<sub>2</sub>]<sup>3+</sup>); c) simulated isotopic profile for C<sub>124</sub>H<sub>160</sub>D<sub>57</sub>N<sub>40</sub>O<sub>40</sub>S<sub>4</sub>Zn, +3; d) measured isotopic profile of complex ([ZnL]<sup>2+</sup>); and e) simulated isotopic profile for C<sub>62</sub>H<sub>80</sub>D<sub>28</sub>N<sub>20</sub>O<sub>20</sub>S<sub>2</sub>Zn, +2. Arrows indicate possible protected protons. Dashed grey lines indicate monoisotopic peaks. Simulations were conducted using DataAnalysis 4.0 (Bruker Daltonics software).

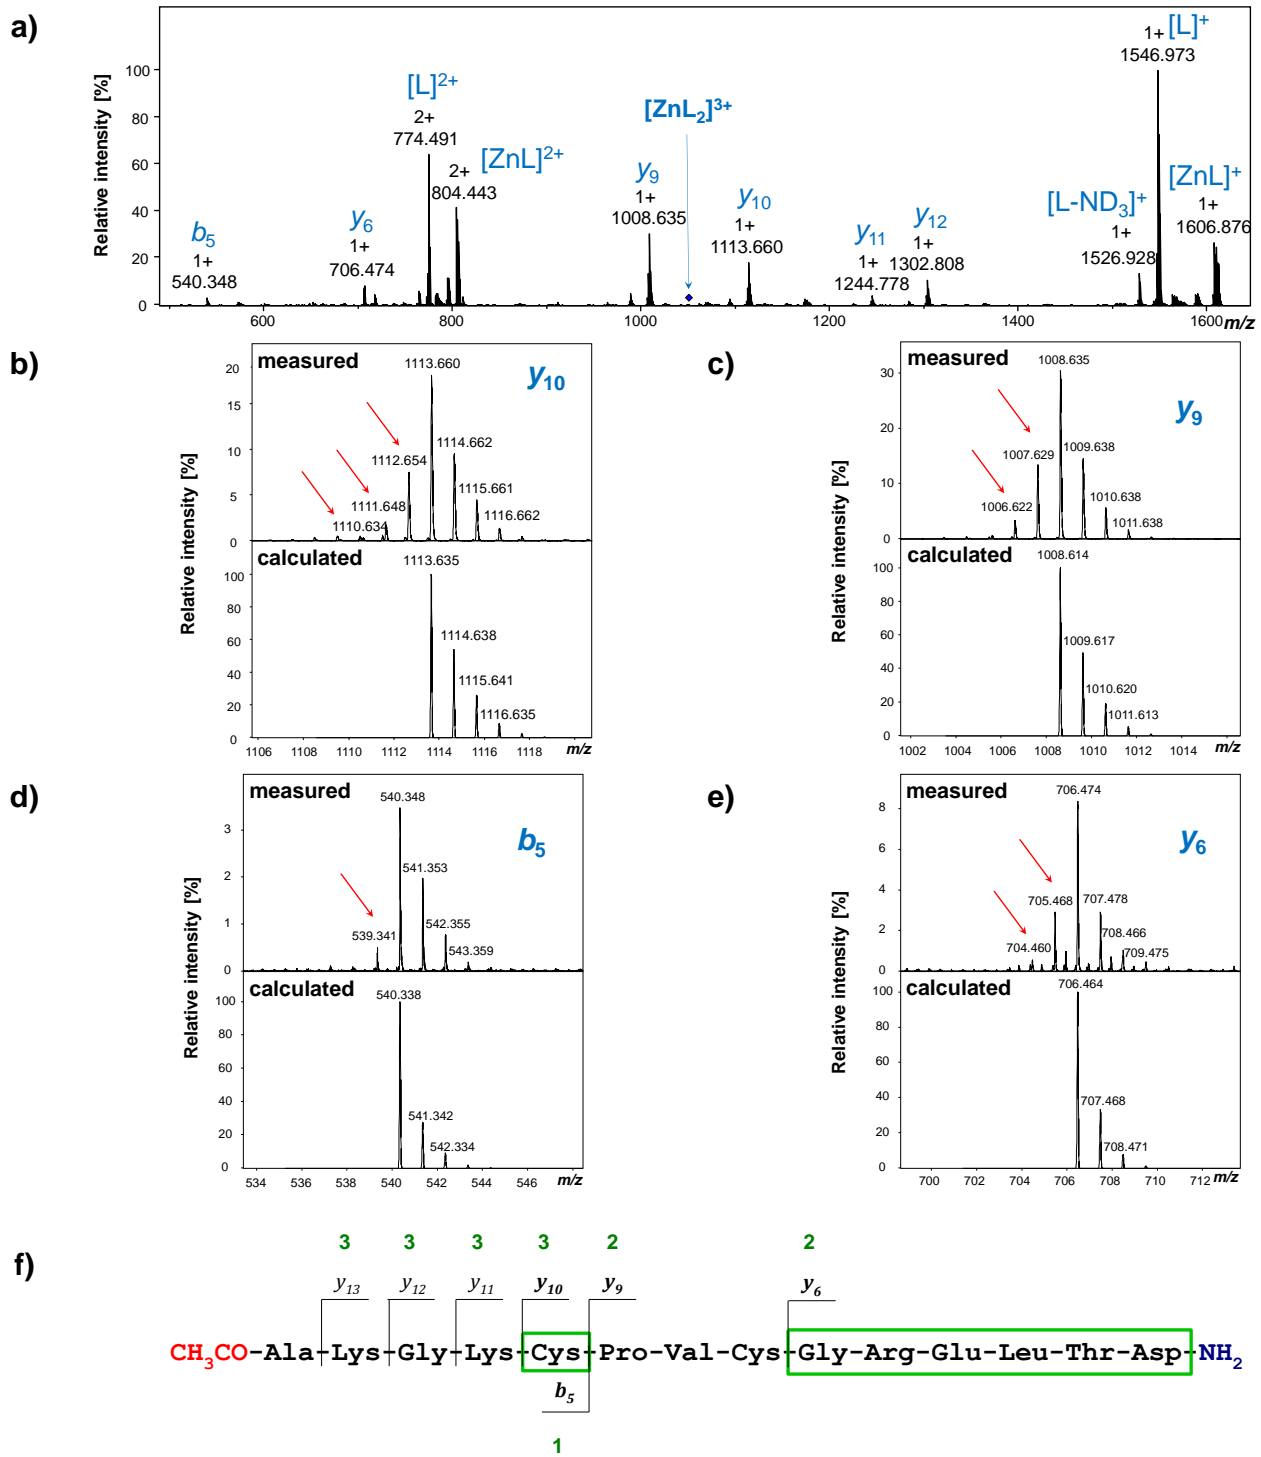

**Figure S7.** Example of HDX MS analysis: fragmentation mass spectrum of deuterated  $\text{Zn}(\text{Hk14})_2$  complex ( $[\text{ZnL}_2]^{3+}$ ) (parent ion 1052.0  $m/z$ , isolation with 5.0  $m/z$  and collision energy 50 eV). a) Whole spectrum with annotated fragment ions; b)–e) isotopic envelopes for selected ion peaks: measured (top) and calculated (fully deuterated, bottom). Red arrows indicate protected protons. From fragments  $y_{10}$  (three protected protons) and  $y_9$  (two protected protons), one protected proton on the Cys444 amide can be assigned, as confirmed by fragment  $b_5$  (one protected proton). Fragment  $y_6$  indicates two protected protons in the Gly-Arg-Glu-Leu-Thr-Asp region. The green box shows the localization of the protected protons. Simulations were conducted using DataAnalysis 4.0 (Bruker Daltonics software).

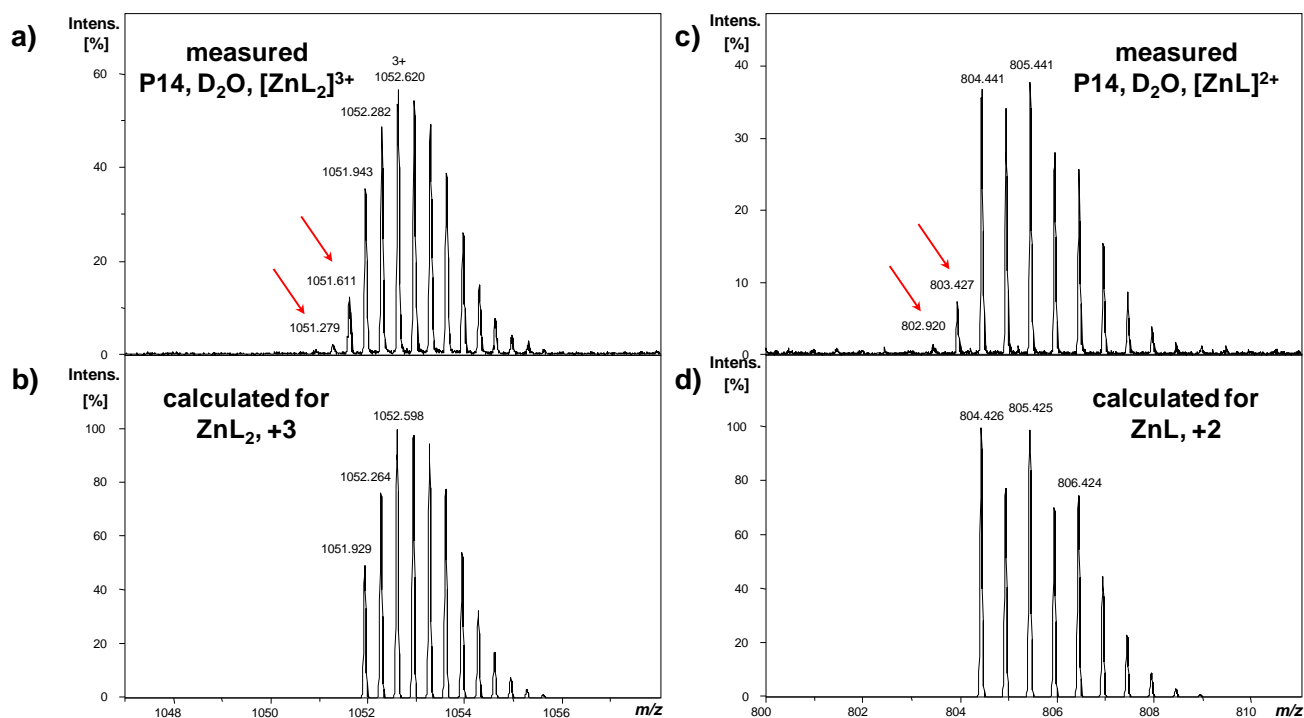

**Figure S8.** Example of HDX MS analysis: comparison of measured (upper panels) and calculated (lower panels) isotopic profiles of Hk14  $\text{Zn}^{2+}$  complexes in  $\text{D}_2\text{O}$  measured on Maxis Impact (qTOF): **a)** measured isotopic profile of complex  $\text{Zn}(\text{Hk14})_2$  ( $[\text{ZnL}_2]^{3+}$ ); **b)** Simulated isotopic profile for  $\text{C}_{124}\text{H}_{160}\text{D}_{57}\text{N}_{40}\text{O}_{40}\text{S}_4\text{Zn}$ , +3; **c)** Measured isotopic profile of complex  $\text{Zn}(\text{Hk14})$   $[\text{ZnL}]^{2+}$ ; **d)** Simulated isotopic profile for  $\text{C}_{62}\text{H}_{80}\text{D}_{28}\text{N}_{20}\text{O}_{20}\text{S}_2\text{Zn}$ , +2. Arrows indicate possible protected protons. Simulations were conducted with DataAnalysis 4.0 (Bruker Daltonics software). The same number of protected protons deduced from spectra measured on ion trap and qTOF points out the importance of the molecule size (which makes other protected protons undetectable).

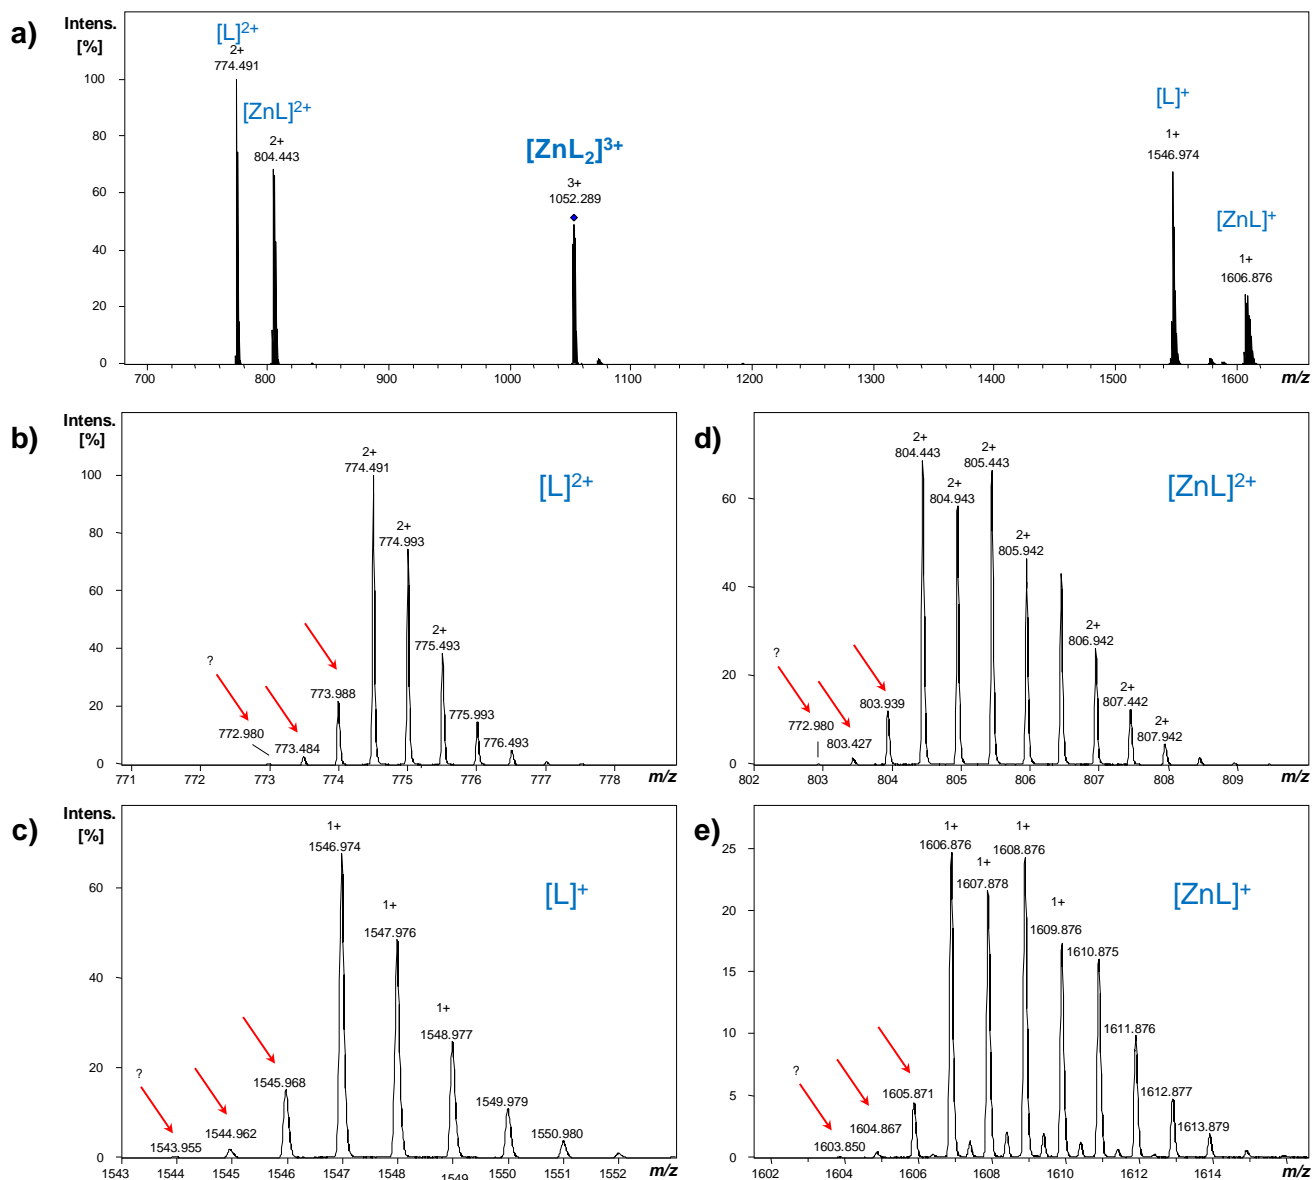

**Figure S9.** Example of HDX MS analysis: fragmentation mass spectrum of deuterated  $Zn(Hk14)_2$  ( $[ZnL_2]^{3+}$ ) complex in  $D_2O$ , measured on Maxis Impact (CID). Parent ion 1052.0  $m/z$ , isolation width 5.0  $m/z$ , collision energy 10 eV. a) Full fragmentation spectrum shows dissociation of a complex  $ZnL_2$  into subunits:  $ZnL$  and  $L$  (charge states were omitted for clarity). b)–d) Isotopic envelopes of selected daughter ions. Red arrows indicate protected protons.



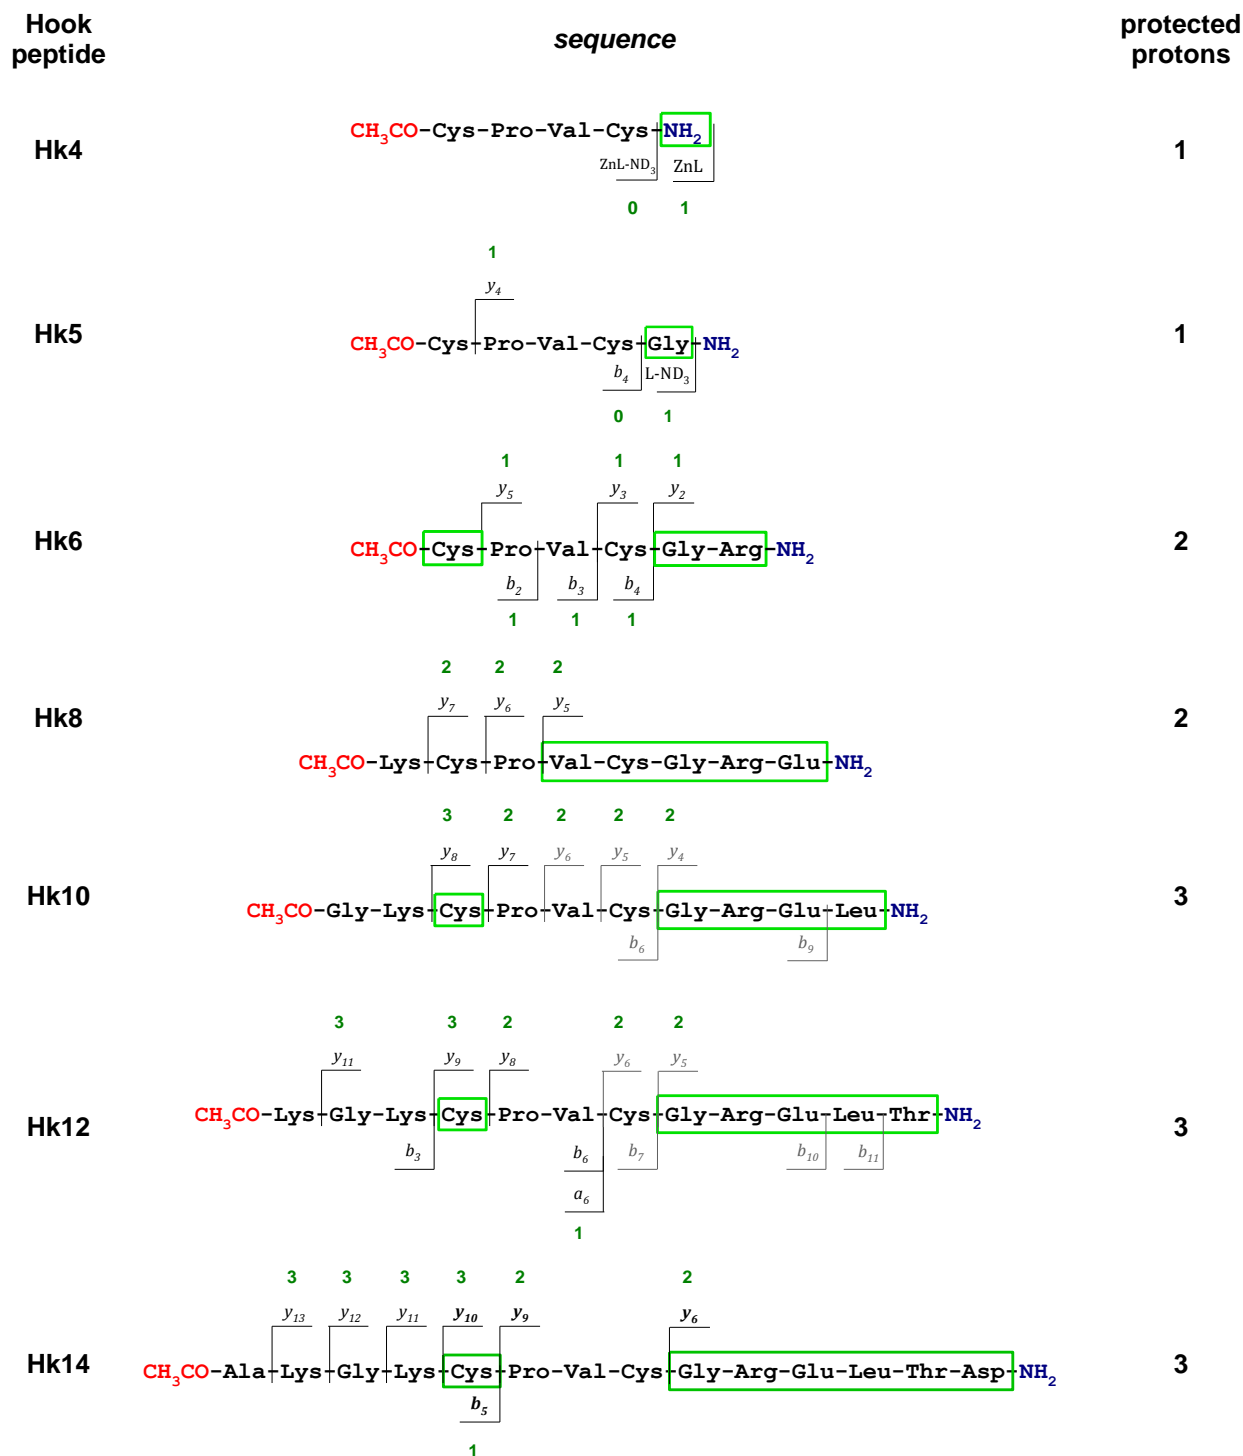

**Figure S10.** Localization of protected protons based on ESI-MS spectra. Green boxes indicate regions with protected amide protons. Single-residue resolution was obtained in only a few cases. The value above each fragment denotes the number of protected protons in that fragment. The right column presents the total number of protected protons in each peptide determined by this method.

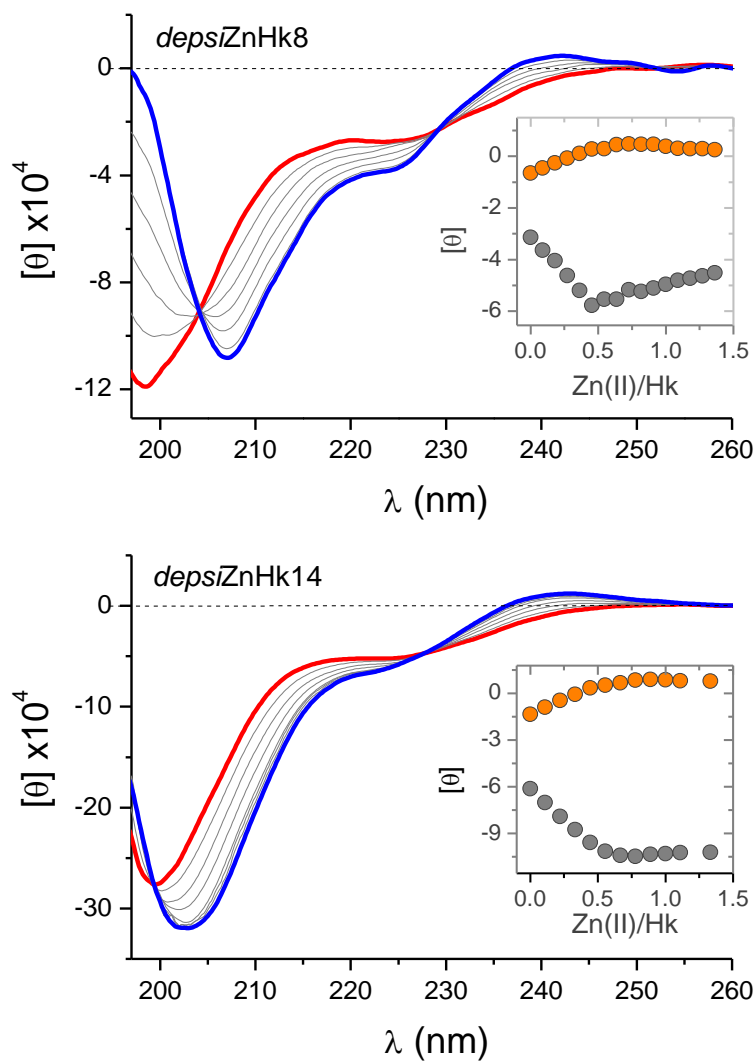

**Figure S11.** Spectropolarimetric titration of zinc hook depsipeptides with  $Zn^{2+}$  in 5 mM Tris buffer ( $I = 0.1$  M from  $NaClO_4$ ) at pH 7.4 and 25°C. Red and blue correspond to free peptide and a  $Zn^{2+}$ -to-peptide ratio of 0.5:1 ( $Zn(Hk)_2$  complex), respectively. Spectra collected at higher ratios were omitted for clarity. Insets present the dependence of the molar ellipticity of the zinc hook peptide, as monitored at 222 (grey circles) and 242 nm (orange circles), on the  $Zn^{2+}$ -to-Hk peptide molar ratio.

**Table S6.** Cumulative protonation and Zn<sup>2+</sup> stability constants ( $\log \beta_{ijk}$ )<sup>a</sup> of zinc hook peptide complexes determined potentiometrically at 25°C,  $I = 0.1$  M (from KNO<sub>3</sub>).<sup>b</sup> *n.d.* denotes not determined under the used conditions.

| $\log \beta_{ijk}$              | Zinc hook peptide |          |             |                  |                   |                         |                           |
|---------------------------------|-------------------|----------|-------------|------------------|-------------------|-------------------------|---------------------------|
|                                 | Hk4VA             | Hk4PA    | Hk4PAV<br>A | <i>depsi</i> Hk8 | <i>depsi</i> Hk14 | <i>depsi</i> Hk14<br>LA | <i>depsi</i> Hk14<br>VALA |
| HL                              | 9.265(8)          | 9.232(9) | 9.233(8)    | 10.66(2)         | 10.79(2)          | 10.79(3)                | 10.77(2)                  |
| H <sub>2</sub> L                | 17.462(9)         | 17.36(1) | 17.323(9)   | 19.43(2)         | 20.53(1)          | 20.91(3)                | 21.28(2)                  |
| H <sub>3</sub> L                | -                 | -        | -           | 27.44(2)         | 29.15(1)          | 29.74(2)                | 30.20(2)                  |
| H <sub>4</sub> L                | -                 | -        | -           | 31.73(2)         | 36.90(1)          | 37.51(3)                | 37.99(1)                  |
| H <sub>5</sub> L                | -                 | -        | -           | -                | 41.41(2)          | 41.88(2)                | 42.45(2)                  |
| H <sub>6</sub> L                | -                 | -        | -           | -                | 45.31(2)          | 46.02(3)                | 46.20(3)                  |
| ZnH <sub>2</sub> L              | -                 | -        | -           | -                | 30.47(3)          | 30.44(7)                | 30.90(3)                  |
| ZnHL                            | -                 | -        | -           | 20.30(2)         | -                 | -                       | -                         |
| ZnL                             | 10.10(3)          | 9.94(4)  | 9.98(2)     | -                | -                 | -                       | -                         |
| ZnH <sub>4</sub> L <sub>2</sub> | -                 | -        | -           | -                | 60.74(2)          | 60.46(6)                | 60.65(3)                  |
| ZnH <sub>3</sub> L <sub>2</sub> | -                 | -        | -           | -                | 50.85(4)          | 50.3(1)                 | 50.79(9)                  |
| ZnH <sub>2</sub> L <sub>2</sub> | -                 | -        | -           | 40.799(8)        | 40.82(3)          | 39.97(9)                | 40.43(9)                  |
| ZnHL <sub>2</sub>               | -                 | -        | -           | 31.13(2)         | -                 | -                       | 29.5(2)                   |
| ZnL <sub>2</sub>                | 19.86(2)          | 19.47(3) | 19.17(2)    | <i>n.d.</i>      | <i>n.d.</i>       | <i>n.d.</i>             | <i>n.d.</i>               |

<sup>a</sup>  $\beta_{M_iH_jL_k} = [M_iH_jL_k]/([M]^i[H]^j[L]^k)$ , where [L] is the concentration of fully deprotonated zinc hook peptide.

<sup>b</sup> Standard deviations are given as provided by SUPERQUAD calculations and refer to the last digit.

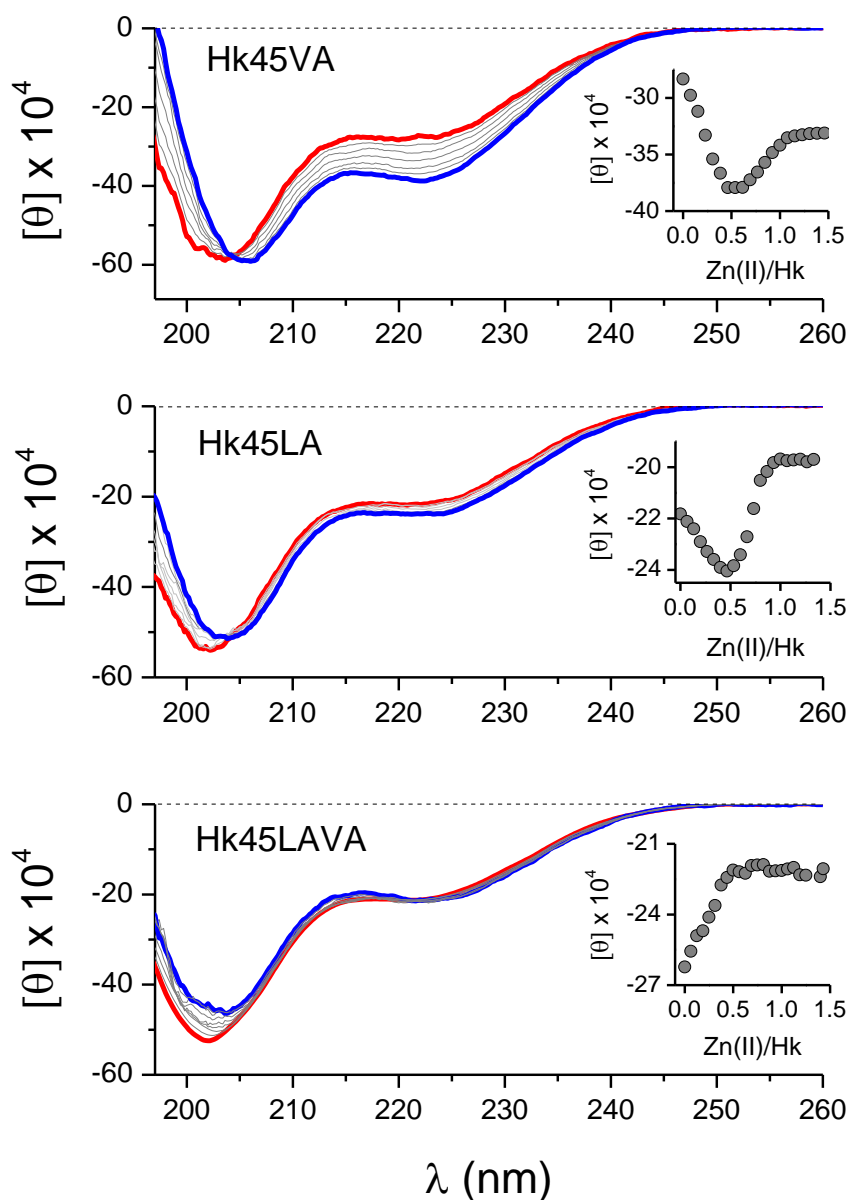

**Figure S12.** Spectropolarimetric titration of Hk45VA, Hk45LA, and Hk45LAVA zinc hook peptides with  $Zn^{2+}$  in 5 mM Tris buffer ( $I = 0.1$  M from  $NaClO_4$ ) at pH 7.4 and 25°C. Red and blue correspond to free peptide and a  $Zn^{2+}$ -to-peptide ratio of 0.5:1 ( $Zn(Hk)_2$  complex), respectively. Spectra collected at higher ratios are omitted for clarity. Insets present the dependence of the molar ellipticity of the zinc hook peptide on the  $Zn^{2+}$ -to-Hk peptide molar ratio. Ellipticity was monitored at either 202 nm (Hk45LAVA) or 222 nm (Hk45VA and Hk45LA).

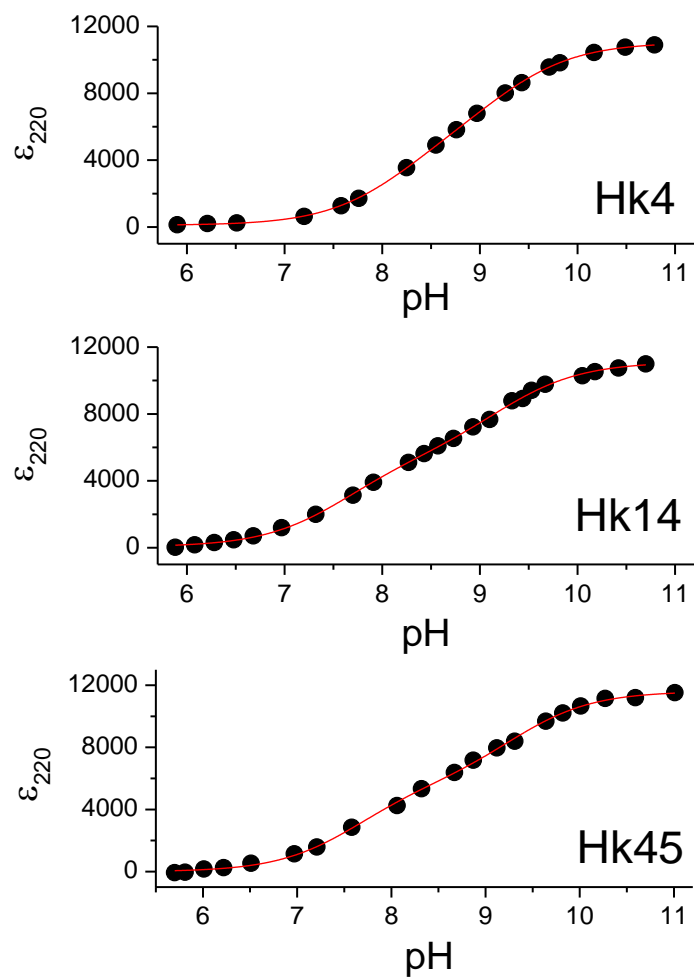

**Figure S13.** Examples of the pH titration of 100  $\mu\text{M}$  metal-free zinc hook peptides in 0.1 M  $\text{NaClO}_4$ , 25°C. Absorbance values were fitted to two-binding-event equations and represent the  $\text{p}K_{\text{a}1}^{\text{SH}}$  and  $\text{p}K_{\text{a}2}^{\text{SH}}$  values of cysteine residues.

**Table S7.** Dissociation constants of the cysteine thiols of zinc hook peptides determined potentiometrically and spectrophotometrically at  $I = 0.1$  M and  $25^\circ\text{C}$ .<sup>a</sup> The  $\text{p}K_{\text{a}1}^{\text{SH}}$  and  $\text{p}K_{\text{a}2}^{\text{SH}}$  values allow the number of protons associated with Cys residues at pH 7.4 to be calculated.

| Hook Peptide | Potentiometry                       |                                     | UV-vis                              |                                     | Number of protons at pH 7.4 |
|--------------|-------------------------------------|-------------------------------------|-------------------------------------|-------------------------------------|-----------------------------|
|              | $\text{p}K_{\text{a}1}^{\text{SH}}$ | $\text{p}K_{\text{a}2}^{\text{SH}}$ | $\text{p}K_{\text{a}1}^{\text{SH}}$ | $\text{p}K_{\text{a}2}^{\text{SH}}$ |                             |
| Hk4          | 8.18 (2)                            | 9.36(1)                             | 8.19 (1)                            | 9.28 (1)                            | 1.86                        |
| Hk5          | 8.04 (2)                            | 9.15 (2)                            | 8.06 (2)                            | 9.20 (2)                            | 1.82                        |
| Hk6          | 7.81 (2)                            | 8.98 (2)                            | 7.92 (3)                            | 9.18 (3)                            | 1.76                        |
| Hk8          | 7.74 (5)                            | 8.88 (4)                            | 7.88 (2)                            | 9.15 (2)                            | 1.74                        |
| Hk10         | 7.36 (3)                            | 8.89 (4)                            | 7.60 (2)                            | 9.19 (3)                            | 1.60                        |
| Hk12         | 7.38 (6)                            | 8.81 (5)                            | 7.59 (2)                            | 9.18 (4)                            | 1.60                        |
| Hk14         | 7.39 (4)                            | 8.99 (3)                            | 7.56 (3)                            | 9.17 (3)                            | 1.58                        |
| Hk23         | <i>n.a.</i>                         | <i>n.a.</i>                         | 7.48 (3)                            | 9.21 (3)                            | 1.55                        |
| Hk27         | <i>n.a.</i>                         | <i>n.a.</i>                         | 7.50 (1)                            | 9.16 (3)                            | 1.55                        |
| Hk31         | <i>n.a.</i>                         | <i>n.a.</i>                         | 7.52 (1)                            | 9.12 (4)                            | 1.56                        |
| Hk37         | <i>n.a.</i>                         | <i>n.a.</i>                         | 7.55 (2)                            | 9.14 (3)                            | 1.57                        |
| Hk45         | <i>n.a.</i>                         | <i>n.a.</i>                         | 7.53 (2)                            | 9.15 (2)                            | 1.56                        |

<sup>a</sup> Statistical errors of constant determinations are given in parentheses and refer to the last digit of the value.

**Table S8.** Average  $pK_a'$  values of the deprotonation of cysteine thiols of hook peptides in the presence of  $Zn^{2+}$  ions determined spectrophotometrically at 25°C and  $I = 0.1$  M (see also Figure S14).

| Mutated peptides | $-\log K_a'$ ( $pK_a'$ ) <sup>a</sup> |
|------------------|---------------------------------------|
| Hk4              | $6.25 \pm 0.01$                       |
| Hk5              | $6.16 \pm 0.01$                       |
| Hk6              | $5.79 \pm 0.01$                       |
| Hk8              | $5.53 \pm 0.01$                       |
| Hk10             | $5.24 \pm 0.01$                       |
| Hk12             | $5.15 \pm 0.01$                       |
| Hk14             | $5.08 \pm 0.01$                       |
| Hk23             | <sup>a</sup>                          |
| Hk27             | <sup>a</sup>                          |
| Hk31             | <sup>a</sup>                          |
| Hk37             | <sup>a</sup>                          |
| Hk45             | $4.70 \pm 0.01$                       |

<sup>a</sup> Values not determined due to peptide precipitation at low pH.

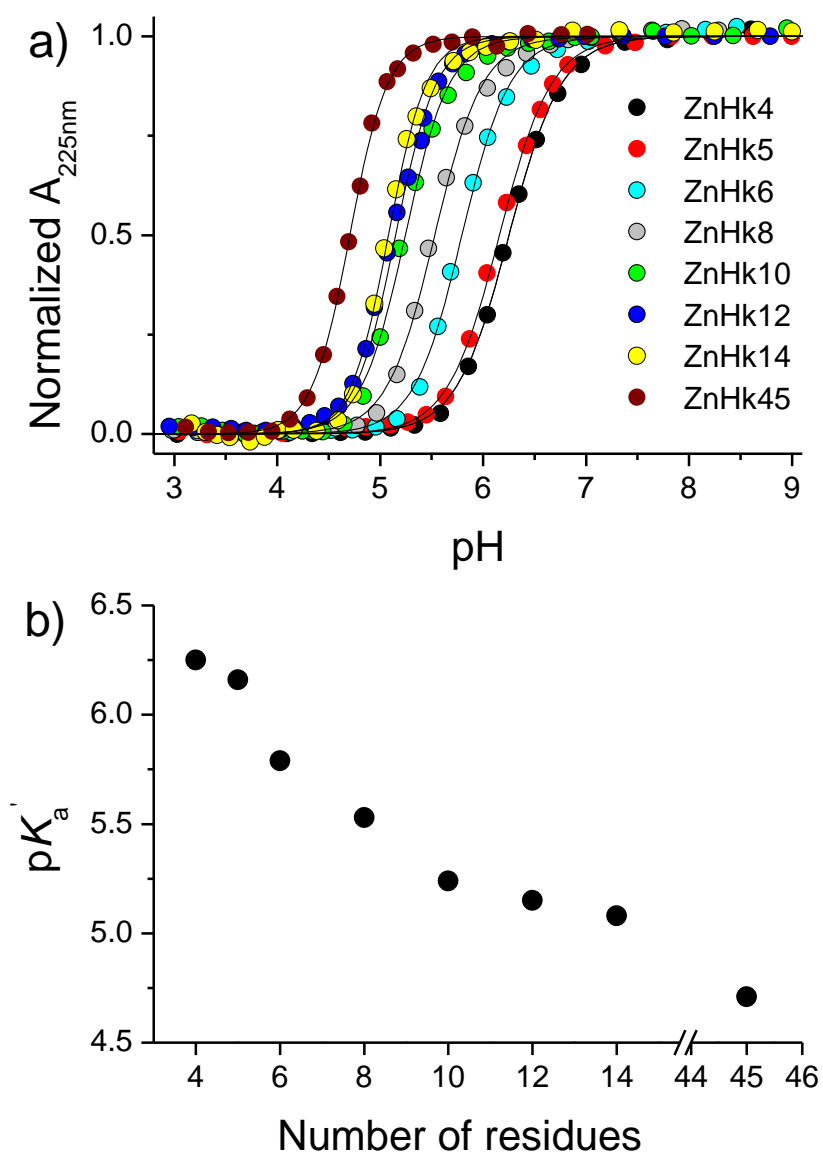

**Figure S14.** Determination of the apparent average thiol dissociation constants ( $pK_a'$ ) of zinc hook peptides in the presence of  $Zn^{2+}$  ions. a) Normalized absorbance at 220 nm corresponding to the formation of the LMCT bands of the complexes. b) Relationship between the length of the zinc hook peptide and  $pK_a'$  value.



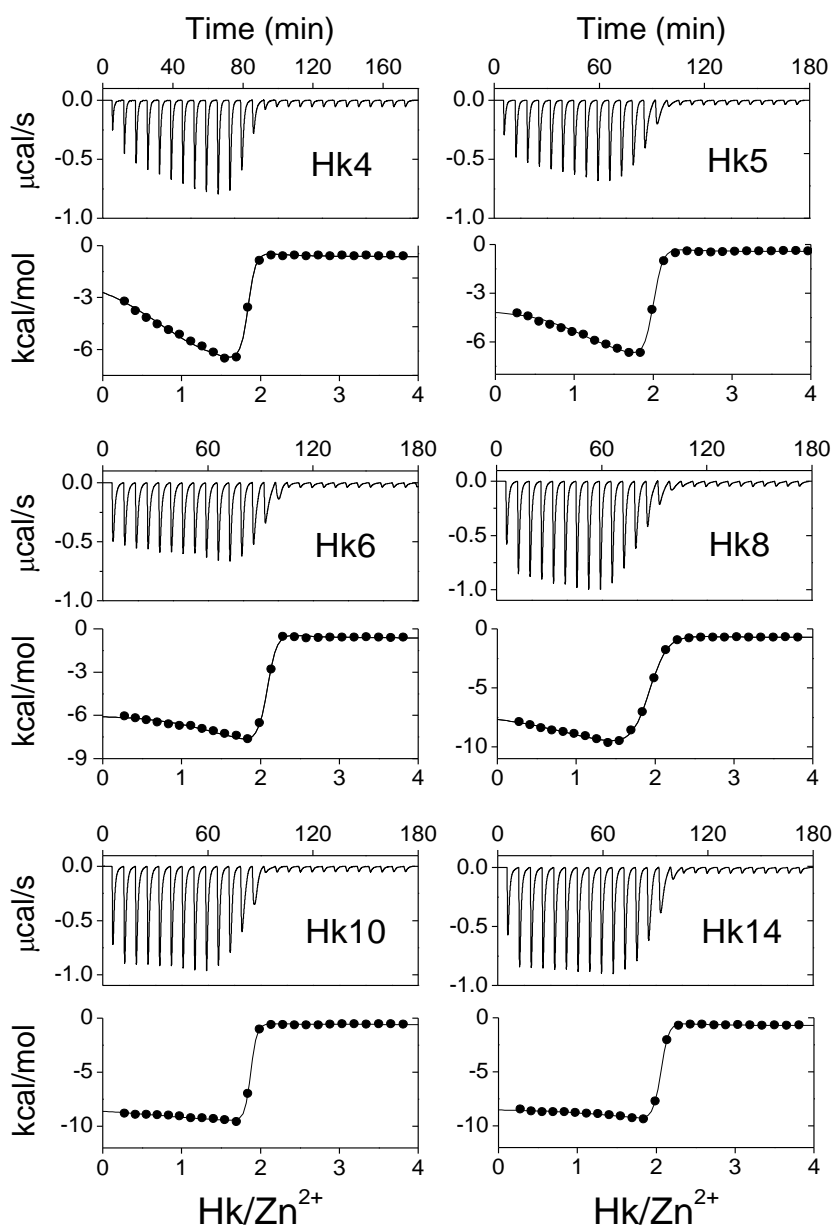

**Figure S15.** ITC traces of 50  $\mu\text{M}$   $\text{Zn}^{2+}$  titration with 1.3 mM zinc hook peptides in 50 mM HEPES, pH 7.4, 25°C. Data were fitted to the sequential binding model. The calculated enthalpies of  $\text{Zn}(\text{Hk})_2$  complex formation are presented in Table 1.

**Table S9.** Best fit values of ITC experiments. Traces for Hk4-Hk14 peptides were fitted to a binding model accounting for the formation of ZnHk and Zn(Hk)<sub>2</sub> complexes during the course of titration and Hk23-Hk45 were fitted to a binding model accounting for the formation of Zn(Hk)<sub>2</sub> complexes.

| Peptide | Reaction 1:<br>$\text{Zn}^{2+} + \text{Hk} \rightleftharpoons \text{ZnHk} (K_1)$ |                                          | Reaction 2:<br>$\text{Zn}^{2+} + 2\text{Hk} \rightleftharpoons \text{Zn(Hk)}_2 (K_{12})$ |                                           |
|---------|----------------------------------------------------------------------------------|------------------------------------------|------------------------------------------------------------------------------------------|-------------------------------------------|
|         | $\log K_1$                                                                       | $\Delta H_{\text{ITC}(1)}$<br>(kcal/mol) | $\log K_{12}$                                                                            | $\Delta H_{\text{ITC}(12)}$<br>(kcal/mol) |
| Hk4     | 7.0                                                                              | -3.2                                     | 13.1                                                                                     | -12.1                                     |
| Hk5     | 7.1                                                                              | -3.8                                     | 13.5                                                                                     | -13.5                                     |
| Hk6     | 6.9                                                                              | -4.9                                     | 14.0                                                                                     | -15.2                                     |
| Hk8     | 6.8                                                                              | -7.9                                     | 13.0                                                                                     | -19.3                                     |
| Hk10    | 6.8                                                                              | -7.8                                     | 13.9                                                                                     | -18.2                                     |
| Hk12    | 6.8                                                                              | -7.8                                     | 14.0                                                                                     | -18.3                                     |
| Hk14    | 6.0                                                                              | -6.2                                     | 14.0                                                                                     | -18.2                                     |
| Hk23    | <i>nd</i>                                                                        | <i>nd</i>                                | 14.8                                                                                     | -17.7                                     |
| Hk27    | <i>nd</i>                                                                        | <i>nd</i>                                | 14.8                                                                                     | -18.1                                     |
| Hk31    | <i>nd</i>                                                                        | <i>nd</i>                                | 13.9                                                                                     | -19.5                                     |
| Hk37    | <i>nd</i>                                                                        | <i>nd</i>                                | 13.6                                                                                     | -20.6                                     |
| Hk45    | <i>nd</i>                                                                        | <i>nd</i>                                | 14.9                                                                                     | -22.5                                     |

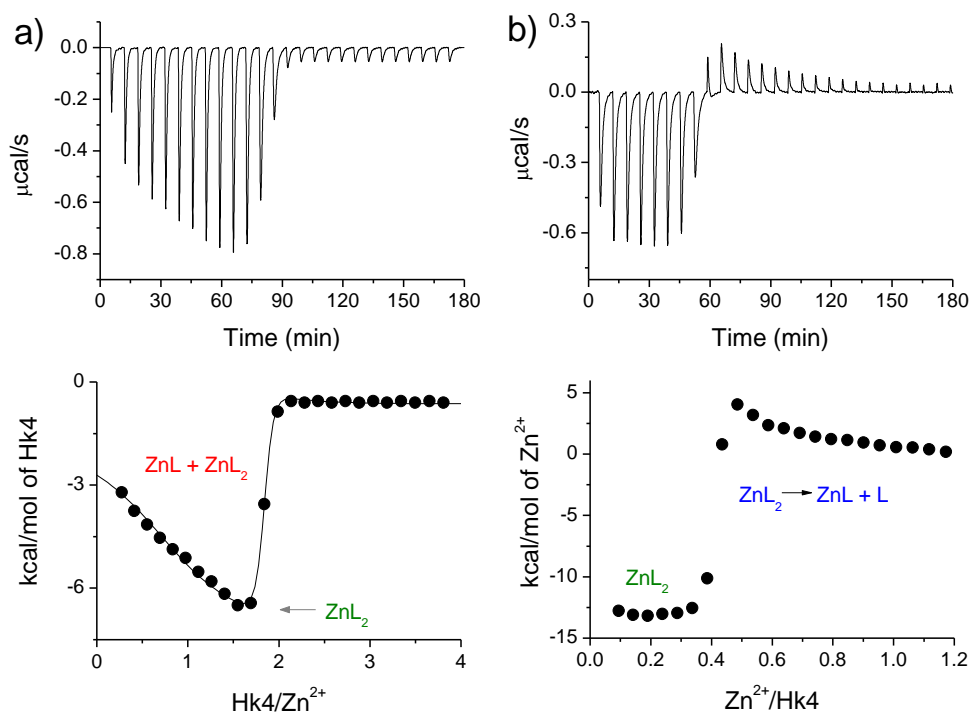

**Figure S16.** Comparison of ITC experiments of Zn-Hk4 system performed in both directions. A) Titration of  $\text{Zn}^{2+}$  with Hk4; b) titration of Hk4 with  $\text{Zn}^{2+}$ . Both experiments were performed in 50 mM HEPES buffer ( $I = 0.1$  M), pH 7.4,  $25^\circ\text{C}$ . Red color shows titration range where both ZnL and  $\text{ZnL}_2$  complexes are formed. Green color refers to the range where  $\text{ZnL}_2$  complex is preferentially formed. Blue color indicates the range where  $\text{ZnL}_2$  complex dissociates to ZnL upon addition of  $\text{Zn}^{2+}$  ions. Note that both titrations show full reversibility of ZnL and  $\text{ZnL}_2$  complex formation.

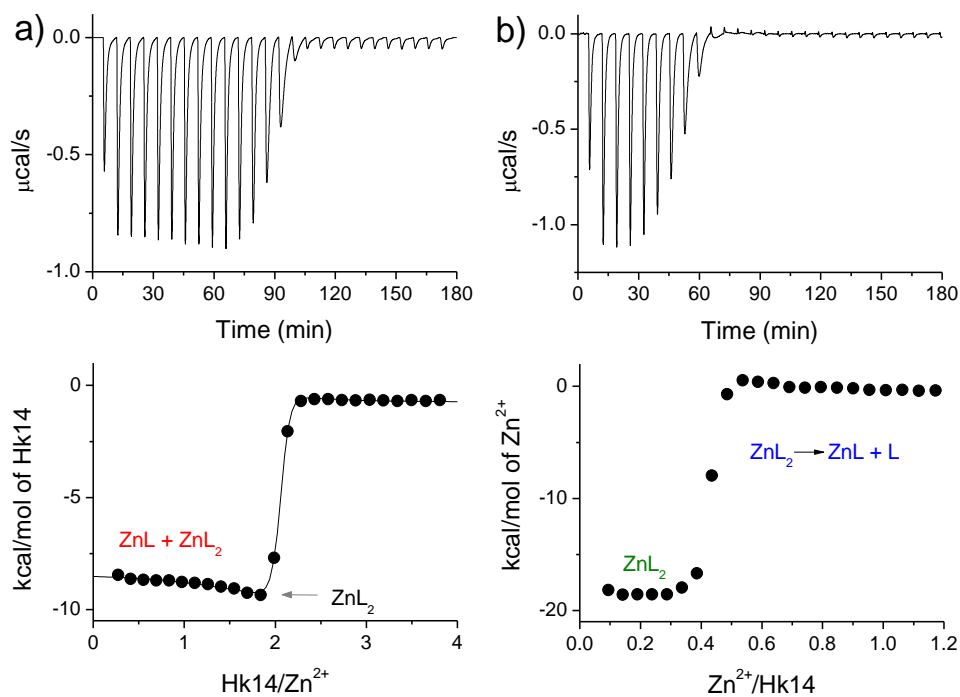

**Figure S17.** Comparison of ITC experiments of Zn-Hk14 system performed in both directions. A) Titration of Zn<sup>2+</sup> with Hk14; b) titration of Hk14 with Zn<sup>2+</sup>. Both experiments were performed in 50 mM HEPES buffer ( $I = 0.1$  M), pH 7.4, 25°C. Red color shows titration range where both ZnL and ZnL<sub>2</sub> complexes are formed. Green color refers to the range where ZnL<sub>2</sub> complex is preferentially formed. Blue color indicates the range where ZnL<sub>2</sub> complex dissociates to ZnL upon addition of Zn<sup>2+</sup> ions. Note that both titrations show full reversibility of ZnL and ZnL<sub>2</sub> complex formation.

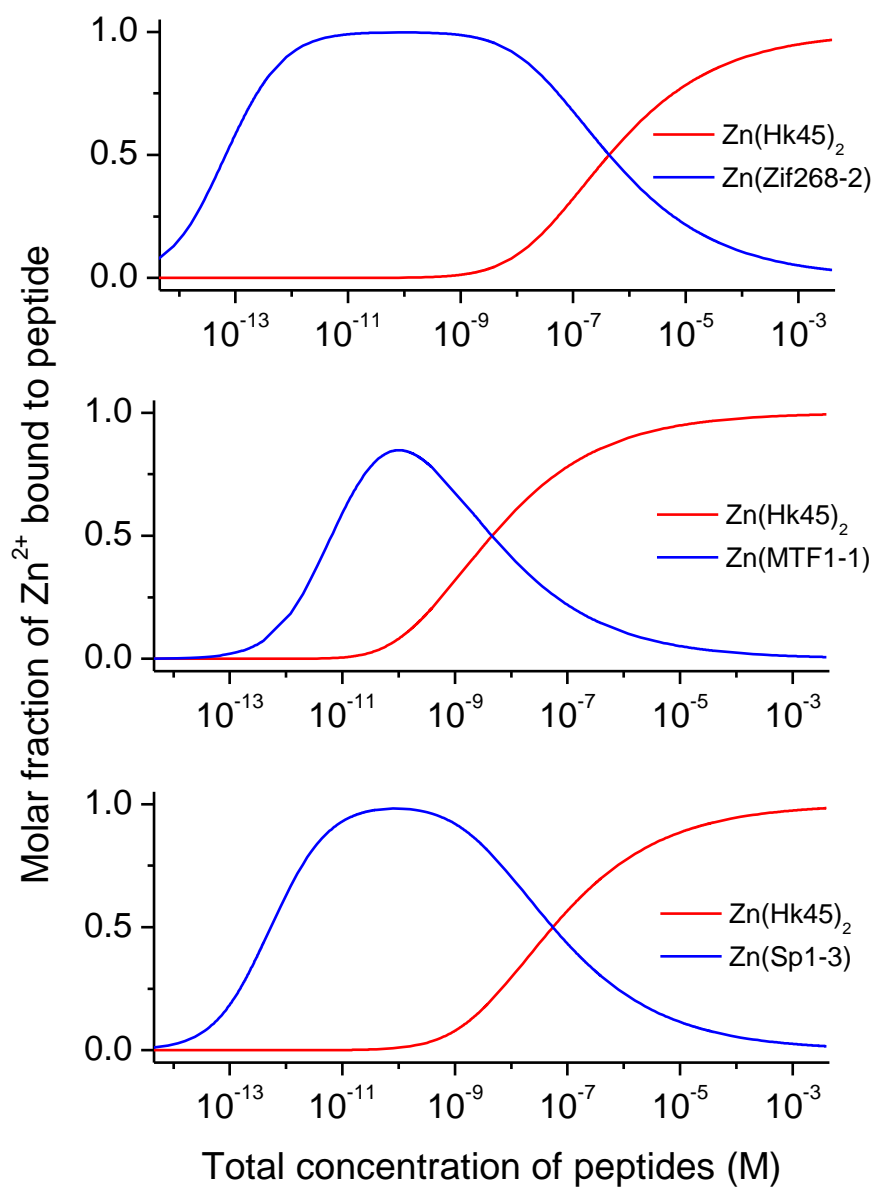

**Figure S18.** Speciation of  $\text{Zn}^{2+}$  complexes formed by equimolar amounts of zinc finger and zinc hook Hk45 peptides at various concentrations at pH 7.4.<sup>22</sup> a) Zif268-1 zinc finger ( $\log K = 13.6$ ), Hk45 ( $\log K_{12} = 20.74$ ) and  $\text{Zn}^{2+}$  at molar ratio of 2:2:1; b) Sp1-3 zinc finger ( $\log K = 12.70$ ), Hk45 and  $\text{Zn}^{2+}$  at molar ratio of 2:2:1. c) MTF1-1 zinc finger ( $\log K = 12.70$ ), Hk45 and  $\text{Zn}^{2+}$  at molar ratio of 2:2:1.

## Additional information for Experimental section

**Table S10.** The calculated ( $MW_{cal}$ ) and experimentally determined ( $MW_{exp}$ ) molecular masses of zinc hook peptides. Depending on the length of the peptide, the monoisotopic (m) or average (av) mass is listed.

| Zinc hook peptide                                                                   | Short name            | $MW_{cal}$           | $MW_{exp}$           |
|-------------------------------------------------------------------------------------|-----------------------|----------------------|----------------------|
| Ac-CPVC-NH <sub>2</sub>                                                             | Hk4                   | 461.2 <sup>m</sup>   | 461.2 <sup>m</sup>   |
| Ac-C <u>A</u> VC-NH <sub>2</sub>                                                    | Hk4PA                 | 435.2 <sup>m</sup>   | 435.3 <sup>m</sup>   |
| Ac-CP <u>A</u> C-NH <sub>2</sub>                                                    | Hk4VA                 | 433.1 <sup>m</sup>   | 433.2 <sup>m</sup>   |
| Ac-C <u>AA</u> C-NH <sub>2</sub>                                                    | Hk4PAVA               | 407.1 <sup>m</sup>   | 407.2 <sup>m</sup>   |
| Ac-CPVCG-NH <sub>2</sub>                                                            | Hk5                   | 518.2 <sup>m</sup>   | 518.5 <sup>m</sup>   |
| Ac-CPVCGR-NH <sub>2</sub>                                                           | Hk6                   | 674.3 <sup>m</sup>   | 674.6 <sup>m</sup>   |
| Ac-KCPVCGRE-NH <sub>2</sub>                                                         | Hk8                   | 931.4 <sup>m</sup>   | 931.7 <sup>m</sup>   |
| Ac-KCPVC*GRE-NH <sub>2</sub>                                                        | <i>depsi</i> Hk8      | 932.4 <sup>m</sup>   | 932.7 <sup>m</sup>   |
| Ac-GKCPVCGREL-NH <sub>2</sub>                                                       | Hk10                  | 1102.4 <sup>m</sup>  | 1102.3 <sup>m</sup>  |
| Ac-KGKCPVCGRELT-NH <sub>2</sub>                                                     | Hk12                  | 1331.6 <sup>av</sup> | 1331.6 <sup>av</sup> |
| Ac- <u>A</u> KGKCPVCGRELTD-NH <sub>2</sub>                                          | Hk14                  | 1517.8 <sup>av</sup> | 1517.8 <sup>av</sup> |
| Ac- <u>A</u> KGKCPVC*GRELTD-NH <sub>2</sub>                                         | <i>depsi</i> Hk14     | 1518.8 <sup>av</sup> | 1519.2 <sup>av</sup> |
| Ac- <u>A</u> KGKCPVC*GRE <u>A</u> TD-NH <sub>2</sub>                                | <i>depsi</i> Hk14LA   | 1476.7               | 1476.6               |
| Ac- <u>A</u> KGKCP <u>A</u> C*GRE <u>A</u> TD-NH <sub>2</sub>                       | <i>depsi</i> Hk14VALA | 1448.7               | 1448.4               |
| Ac-LKKAKGKCPVCGRELTDREEL-NH <sub>2</sub>                                            | Hk23                  | 2681.1 <sup>av</sup> | 2679.2 <sup>av</sup> |
| Ac-EELKKAKGKCPVCGRELTDREEL-LS-NH <sub>2</sub>                                       | Hk27                  | 3140.3               | 3139.5 <sup>av</sup> |
| Ac-AIEELKKAKGKCPVCGRELTDREELLSKY-NH <sub>2</sub>                                    | Hk31                  | 3615.1 <sup>av</sup> | 3615.7 <sup>av</sup> |
| Ac-LKTAIEELKKAKGKCPVCGRELTDREELLSKYHLD-NH <sub>2</sub>                              | Hk37                  | 4322.9 <sup>av</sup> | 4323.4 <sup>av</sup> |
| Ac-KIGDLKTAIEELKKAKGKCPVCGRELTDREELLSKYHLDLNNNS-NH <sub>2</sub>                     | Hk45                  | 5164.8 <sup>av</sup> | 5165.8 <sup>av</sup> |
| Ac-KIGDLKTAIEELKKAKGKCP <u>A</u> CGRELTDREELLSKYHLDLNNNS-NH <sub>2</sub>            | Hk45VA                | 5136.8 <sup>av</sup> | 5136.7 <sup>av</sup> |
| Ac-KIGDLKTAIEELKKAKGKCPVCGRE <u>A</u> TDEHREELLSKYHLDLNNNS-NH <sub>2</sub>          | Hk45LA                | 5122.8 <sup>av</sup> | 5123.3 <sup>av</sup> |
| Ac-KIGDLKTAIEELKKAKGKCP <u>A</u> CGRE <u>A</u> TDEHREELLSKYHLDLNNNS-NH <sub>2</sub> | Hk45AA                | 5094.7 <sup>av</sup> | 5095.4 <sup>av</sup> |

**Table S11.** Relevant NMR experimental parameters.

| Experiment (overall experiment time)      | Dimension | Nucleus         | Complex points of time domain | Acquisition time (ms) |
|-------------------------------------------|-----------|-----------------|-------------------------------|-----------------------|
| $^1\text{H}/^{15}\text{N}$ HSQC (182 min) | $t_1$     | $^{15}\text{N}$ | 128                           | 58.2                  |
|                                           | $t_2$     | $^1\text{H}$    | 1024                          | 85.2                  |
| $^1\text{H}/^{13}\text{C}$ HSQC (133 min) | $t_1$     | $^{13}\text{C}$ | 128                           | 6.1                   |
|                                           | $t_2$     | $^1\text{H}$    | 1024                          | 85.2                  |
| TOCSY (116 min)                           | $t_1$     | $^1\text{H}$    | 256                           | 40.3                  |
|                                           | $t_2$     | $^1\text{H}$    | 541                           | 85.3                  |
| ROESY (13 h 4 min)                        | $t_1$     | $^1\text{H}$    | 256                           | 40.3                  |
|                                           | $t_2$     | $^1\text{H}$    | 541                           | 85.3                  |

## References:

- 1 J. Eildal, G. Hultqvist, T. Balle, N. Stuhr-Hansen, S. Padrah, S. Gianni, K. Strømgaard and P. Jemth, *J. Am. Chem. Soc.*, 2013, **135**, 12998-13007.
- 2 P. Eyer, F. Worek, D. Kiderlen, G. Sinko, A. Stuglin, V. Simeon-Rudolf and E. Reiner, *Anal. Biochem.*, 2003, **312**, 224-227.
- 3 A. Krężel, R. Latajka, G. Bujacz and W. Bal, *Inorg. Chem.*, 2003, **42**, 1994-2003.
- 4 P. Gans, A. Sabatini and A. Vacca, *J. Chem. Soc., Dalton Trans.*, 1985, **6**, 1195.
- 5 A. Krężel and W. Maret, *Arch. Biochem. Biophys.*, 2016, doi: 10.1016/j.abb.2016.04.010.
- 6 L. Alderighi, P. Gans, A. Ienco, D. Peters, A. Sabatini and A. Vacca, *Coord. Chem. Rev.*, 1999, **184**, 311-318.
- 7 M. Sikorska, A. Krężel and J. Otlewski, *J. Inorg. Biochem.*, 2012, **115**, 28-35.
- 8 J. Adamczyk, W. Bal and A. Krężel, *Inorg. Chem.*, 2015, **54**, 596-606.
- 9 A. Krężel and W. Bal, *J. Inorg. Biochem.*, 2004, **98**, 161-166.
- 10 S. Forsén and R. Hoffman, *J. Chem. Phys.*, 1963, **39**, 2892.
- 11 J. Wójcik, K. Rusczyńska, I. Zhukov and A. Ejchart, *Acta Biochim. Polon.*, 1998, **46**, 651-663.
- 12 Y. Bai, J. Milne, L. Mayne and S. Englander, *Proteins Structure Funct. Bioinf.* 1993, **17**, 75-86.
- 13 L. Braunschweiler and R. Ernst, *J. Magn. Reson.*, (1969), 1983, **53**, 521-528.
- 14 A. Bax and D. Davis, *J. Magn. Reson.*, (1969), 1985, **63**, 207-213.
- 15 G. Bodenhausen and D. Ruben, *Chem. Phys. Lett.*, 1980, **69**, 185-189.
- 16 D. Marion, M. Ikura, R. Tschudin and A. Bax, *J. Magn. Reson.*, (1969), 1989, **85**, 393-399.
- 17 D. Wishart, C. Bigam, J. Yao, F. Abildgaard, H. Dyson, E. Oldfield, J. Markley and B. Sykes, *J. Biomol. NMR*, 1995, **6**, 135-140.
- 18 T. Goddard and D. Kneller, SPARKY 3, *University of California, San Francisco* 15, 2004
- 19 T. Herrmann, P. Güntert and K. Wüthrich, *J. Biomol. NMR*, 2002, **24**, 171-189.
- 20 K. Hopfner, L. Craig, G. Moncalian, R. Zinkel, T. Usui, B. Owen, A. Karcher, B. Henderson, J. Bodmer, C. McMurray, J. Carney, J. Petrini and J. Tainer, *Nature*, 2002, **418**, 562-566.
- 21 G. Vriend, *J. Mol. Graph.*, 1990, **8**, 52-56.
- 22 T. Kočańczyk, A. Drozd and A. Krężel, *Metallomics*, 2015, **7**, 244-257.
